# Supplementary material for: Prediction of landslide induced debris’ severity using machine learning algorithms: a case of South Korea
Source: Copernicus journal article supplement (doi:10.5194/nhess-2023-73), 2023-06-08
Supplement: Supplementary file [file nhess-2023-73-AC2-supplement.pdf]

1 **Manuscript number: nhess-2023-73**

2 My co-authors and I would like to express our gratitude to the reviewers for their constructive  
3 feedback and suggestions for strengthening our research. The changes we have made to the  
4 attached file in response to such feedback and suggestions have been highlighted in blue to  
5 facilitate their identification. I would also like to offer my apologies for the length of time it  
6 took us to prepare this response. We also record our deep appreciation for the efficient handling  
7 of the manuscript.

8  
9 **Response to Reviewer#2**

10 **General remarks:** Landslide volume prediction is the key to Landslide risk analysis and  
11 prediction. The topic of this paper is very interesting. However, the paper is poor prepared. The  
12 structure of the paper is weakly logical and I cannot follow the paper clearly. My decision of  
13 this manuscript is rejection. Please find my comments as following.

14  
15 We would like to thank the reviewer for her/his insightful comments, which have greatly  
16 contributed to improving the text as well as the logical structure of the manuscript. We have  
17 responded point by point to all the comments and suggestions raised by Reviwer#2 as follows:  
18

19 **Comment 1:** The logic of the paper's structure is unclear. I suggest the authors to organize the  
20 paper according to Introduction – study area – Data colleagues and Methods -  
21 Results - Discussion - Conclusion.

22  
23 **Response:** Thank you for your comment. We understand the reviewer's concern and have  
24 accordingly restructured the manuscript as follows: Introduction – Study Area – Data and  
25 Methods – Results – Discussion – Conclusion.

26  
27 **Comment 2:** The introduction section should rewrite. For example, the author describes the  
28 damage caused by the landslide in several places. Line 56 -58: The author talks  
29 very abruptly about landslide volumes.

30  
31 **Response:** Thank you for your comment. As suggested, the introduction section has been  
32 rewritten in the revised manuscript with greater emphasis on landslide volumes as follows:  
33

34 ‘Rainfall-induced landslides (RFIL) frequently occur in the mountainous region of South  
35 Korea due to the heavy rainfall during the monsoon season (July to September) (Lee et al.,  
36 2013). The RFIL debris occurs when the slope fails due to the saturation of soil after the rainfall  
37 exceeds a certain threshold (Au, 1998; Takara et al., 2010; Peruccacci et al., 2017; Segoni et  
38 al., 2018; Crawford et al., 2019; Coppola et al., 2022). These RFIL-resulting debris, depending  
39 on their volume, cause enormous environmental degradation, infrastructure damage, casualties,  
40 and loss of life, which disturb the socio-economic aspect of the community (Li et al., 2012;

41 Sarkar and Dorji, 2019; Zhao et al., 2019; Taylor et al., 2020; Lacroix et al., 2020; Winter,  
42 2020; Negi et al., 2020; Ju et al., 2020; Van et al., 2021). Park et al. (2013) reported that the  
43 annual property damage caused by RFIL in South Korea averaged between US\$500M to  
44 US\$1000M and approximately 36 human deaths per year from 1997 to 2010. Therefore,  
45 predicting the volume of debris resulting from RFIL is essential for managing the effect of  
46 RFIL debris and planning for post-disaster recovery.

47 To mitigate and prevent the effect of RFIL in South Korea, different studies have been  
48 carried out on landslide susceptibility modeling (Kadavi et al., 2019; Lee and Winter, 2019;  
49 Sameen et al., 2020; Panahi et al., 2020; Hakim et al., 2022). Lee et al. (2020) applied the Naïve  
50 and Bayesian Networks model for landslide susceptibility mapping in Umyeon Mountain. Lee  
51 et al. (2012) used physical slope and probabilistic model, i.e., decision trees and logistic  
52 regression for landslide susceptibility mapping in Gangwon-do. Lee et al. (2013) developed  
53 the binary logistic regression model for predicting the occurrence of landslides. Woo et al.  
54 (2014) constructed a landslide hazard map using binary logistic regression. Park and Kim  
55 (2019) compared boosted trees and random forest model's performance in landslide  
56 susceptibility mapping for Umyeon Mountain; the same methods were previously applied at  
57 Pyeong-Chang by Kim et al. (2018). It was observed that the objectives of previous studies  
58 were to predict landslide susceptibility, but they did not specify the size (volume) of the  
59 occurring landslides (Lee et al., 2013; Park and Kim, 2019; Lee et al., 2020).

60 Globally, numerous researchers have attempted to predict the landslide magnitude  
61 through different statistical approaches (Lombardo et al., 2020). For example, Dai and Lee  
62 (2001) analyzed the relationship between landslide volume, cumulative frequency, and the  
63 connection between rainfall and landslide occurrence. Malamud et al. (2004) proposed  
64 frequency and size distribution for landslides to quantify the magnitude of landslide events.  
65 Shirzadi et al. (2017) compared popular statistical and machine-learning methods for  
66 simulating the volume of landslides. Lombardo et al. (2018) introduced the concept of  
67 estimating landslide intensity to complement susceptibility measures. They used the Poisson  
68 distribution for spatial estimates of the landslide intensity within terrain units. Further,  
69 Lombardo et al. (2021) explored advanced techniques, leveraging Bayesian versions of a  
70 Generalized Additive Model and Log-Gaussian model to estimate landslide susceptibility and  
71 intensity. The existing literature lacks a widely applied machine-learning model capable of  
72 capturing and predicting landslide sizes (volume). To address this gap and assess the potential  
73 of machine learning methods for predicting landslide volume in South Korea, we used the  
74 proportional odds logistic regression (POLR), random forest (RF), support vector machine  
75 (SVM), and extreme gradient boosting (EGB) methods to evaluate the relationship between  
76 various influencing & triggering factors and RFIL debris volume. Consequently, the present  
77 study aims to predict the RFIL debris volume based on the triggering and influencing factors.  
78 The quantification of debris volume may be useful in land management by highlighting regions  
79 prone to higher RFIL debris to know whether economic activities may be carried out in the  
80 given region, so that those activities may not be vulnerable to extreme landslide hazards.'

81  
82

83 **Comment 3:** The subject of the paper is very unclear. What is the difference between Rainfall-  
84 induced debris and Landslide-induced debris? In my opinion, they are different.  
85 The author needs to give a clear definition of the research subject of the paper.  
86

87 **Response:** Thank you for your insightful review. We appreciate your insights regarding the  
88 clarity of the paper's subject. Your input is valuable in enhancing our research's overall clarity  
89 and conciseness.

90 Rainfall-induced debris and landslide-induced debris are different processes related to  
91 the movement of materials on slopes. Rainfall-induced debris occurs when extensive or  
92 prolonged rainfall removes loose materials like soil, rocks, and vegetation, leading to erosion  
93 and surface runoff. It frequently affects areas with steep slopes and insufficient vegetation  
94 cover. On the other hand, landslide-induced debris results from significant slope failures, where  
95 a large mass of soil, rock, and debris moves downslope due to triggers like extensive rainfall,  
96 earthquakes, or human activities. While both processes involve the movement of debris,  
97 rainfall-induced debris mostly involves surface erosion caused by rainfall impact. In contrast,  
98 landslide-induced debris stems from more profound slope failures caused by various factors.  
99 However, the present study focuses on rainfall-induced landslides (RFIL) debris volume  
100 prediction through different machine learning algorithms.

101  
102 Accordingly, the introduction section has been revised in the manuscript.  
103

104 **Comment 4:** Magnitude of landslide-induced debris and debris severity are two totally  
105 different probabilities, and the authors confuse them in the introduction. There  
106 is a big difference between Landslide and Landslide-induced debris. The author  
107 has confused them in the manuscript as well.  
108

109 **Response:** Thank you for your comment and valuable insight. We appreciate your observation  
110 regarding the distinction between 'Magnitude of landslide-induced debris' and 'debris severity.'  
111 We apologize for any confusion caused by our terminology. For clarification, the magnitude  
112 of landslide-induced debris refers to the volume and size of materials involved, while debris  
113 severity denotes the level of damage caused. These concepts represent distinct probabilities:  
114 one quantifies the physical extent, and the other assesses the potential impact and destruction  
115 resulting from landslides. Accordingly, we thoroughly revised the introduction section in the  
116 revised manuscript.  
117

118 **Comment 5:** The authors present a lot of research about landslide susceptibility and hazard  
119 mapping in the study area, but this is not necessary. There are some studies about  
120 landslide volume prediction, but the author do not presents a review of the topic.  
121 This is why the paper's innovation drive is unclear.  
122

123 **Response:** Thank you for your insightful comment. In response to your concern and to enhance  
124 the clarity of the innovative aspect of our paper, we have included a review of the topic of

125 landslide volume prediction in the revised manuscript as,  
126 ‘Globally, numerous researchers have attempted to predict the landslide magnitude  
127 through different statistical approaches (Lombardo et al., 2020). For example, Dai and Lee  
128 (2001) analyzed the relationship between landslide volume, cumulative frequency, and the  
129 connection between rainfall and landslide occurrence. Malamud et al. (2004) proposed  
130 frequency and size distribution for landslides to quantify the magnitude of landslide events.  
131 Shirzadi et al. (2017) compared popular statistical and machine-learning methods for  
132 simulating the volume of landslides. Lombardo et al. (2018) introduced the concept of  
133 estimating landslide intensity to complement susceptibility measures. They used the Poisson  
134 distribution for spatial estimates of the landslide intensity within terrain units. Further,  
135 Lombardo et al. (2021) explored advanced techniques, leveraging Bayesian versions of a  
136 Generalized Additive Model and Log-Gaussian model to estimate landslide susceptibility and  
137 intensity. The existing literature lacks a widely applied machine-learning model capable of  
138 capturing and predicting landslide sizes (volume). To address this gap and assess the potential  
139 of machine learning methods for predicting landslide volume in South Korea, we used the  
140 proportional odds logistic regression (POLR), random forest (RF), support vector machine  
141 (SVM), and extreme gradient boosting (EGB) methods to evaluate the relationship between  
142 various influencing & triggering factors and RFIL debris volume. Consequently, the present  
143 study aims to predict the RFIL debris volume based on the triggering and influencing factors.  
144 The quantification of debris volume may be useful in land management by highlighting regions  
145 prone to higher RFIL debris to know whether economic activities may be carried out in the  
146 given region so that those activities may not be vulnerable to extreme landslide hazards.’

147  
148

149 **Comment 6:** Problem formulation: The authors give a flowchart for the proposed method, but  
150 the goal of the prediction is not clearly stated in this section. This subsection  
151 should rewrite.

152

153 **Response:** Thank you for your comment. We appreciate your attention to detail and your  
154 insights regarding the problem formulation section. The goal of the prediction has been  
155 adequately clarified in the revised version of the flowchart. Furthermore, we have thoroughly  
156 revised the subsection to ensure that the objective of the prediction is explicitly stated and  
157 clearly aligned with the proposed method as follows:

158 ‘The present study aims to predict the RFIL debris volume based on the triggering and  
159 influencing factors. Predictive models that deal with multi-variate random variables were  
160 investigated to predict the volume of the RFIL. In the modeling process, the model choice is  
161 based on the distribution of the data and the type of outcome variable. For continuous outcome  
162 variables, continuous distributions are adopted after the assumptions constrained on the model  
163 are satisfied. The choice of categorical outcome variable depends on the number of categories  
164 (levels) and their order. For the case of two categories, the appropriate model is found in binary  
165 models, while the multi-level models are adopted when the outcome variable has more than  
166 two level categories. Multi-level models are divided into unordered models, which deal with

167 outcome that has no inherent order and ordered models, which deal with data involving  
 168 multiple ordered outcomes. In the present study, concerning the prediction of the volume of  
 169 RFIL debris, the outcome variable was ordered; thus, POLR was chosen after verification of  
 170 proportional odd assumptions (McCullagh, 1980; McNulty, 2021). The POLR has a feature of  
 171 visualizing the effect of each independent variable in the output. The high prediction accuracy  
 172 of RF, SVM, and EGB in a classification problem, these last three models were widely used as  
 173 alternative models for predicting landslide susceptibility (Biau and Scornet, 2016; Lechner and  
 174 Okasa, 2020; Lee et al., 2017; Noble, 2006; Chang et al., 2018; Georganos et al., 2018).  
 175 Therefore, the four models were applied to evaluate the relationship between various  
 176 influencing & triggering factors and RFIL debris volume. Detailed objectives of this study  
 177 were: 1) to collect data of RFIL inventory, triggering and influencing factors; 2) to conduct  
 178 exploratory data analysis to understand the relationship between RFIL debris volume and  
 179 independent variables; 3) to predict the RFIL debris volume based on the triggering and  
 180 influencing factors using suggested models; and 4) to conduct model effectiveness, model  
 181 comparison using predictive accuracy and the value of kappa. The overall methodology is  
 182 depicted in Figure 2.’  
 183

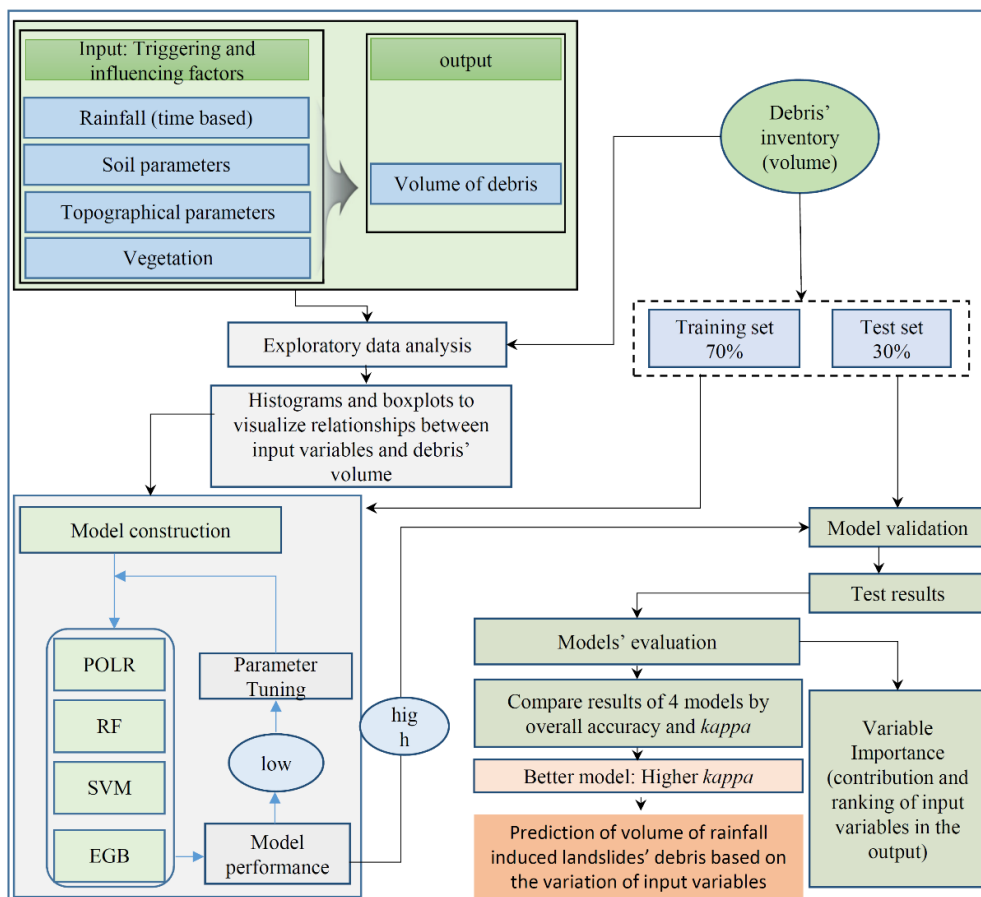

184  
 185  
 186 **Figure 2. Modeling workflow process for the prediction of RFIL debris volume.**

187 **Comment 7:** Table 1: The failure mechanism of each landslide/rackfall type is different. It is  
 188 not reasonable to conduct the volume prediction for these different types without

189 distinction.

190  
191 **Response:** Thank you for your insightful comment. The different types of landslides mentioned  
192 in Table 1 are not all technically distinct landslide types but rather variations in erosion  
193 processes or morphological features. The landslide classes mentioned in Table 1 (preprint  
194 version) describe different geomorphological processes that lead to various landslide forms.  
195 For instance, valley erosion occurs when material moves due to a valley's erosion, and falling  
196 rocks describe the tumbling of loose rocks down slopes (Causes, 2001). While mixed or  
197 complex landslides involve multiple processes, slope failures result from a slope's collapse  
198 (Wang et al., 2016). Landslides from scour result from erosion, while curved wedge-shaped  
199 slides display a distinctly curved structure (Ritchie, 1958). Circular arc-shaped landslides take  
200 on a semi-circular shape, and plane-shaped ones occur on inclined planes (Causes, 2001). Each  
201 type emerges from specific geological actions, defining distinct characteristics and  
202 appearances.

203 However, in the present study, we considered 455 landslide inventory data based on the  
204 magnitude of the landslides: below 500m<sup>3</sup>, between 500-2000m<sup>3</sup>, 2000-5000m<sup>3</sup>, and above  
205 5000m<sup>3</sup> (Fig. 1b). Consequently, we analyzed the relationship between independent variables  
206 and debris size. As a result, Table 1 has been updated in the revised manuscript to provide a  
207 detailed summary of data features rather than focusing solely on different geomorphological  
208 processes. Additionally, a summary of continuous variables is provided in Table 2, including  
209 minimum, mean, median, maximum, standard deviation, and associated units for each  
210 considered feature.

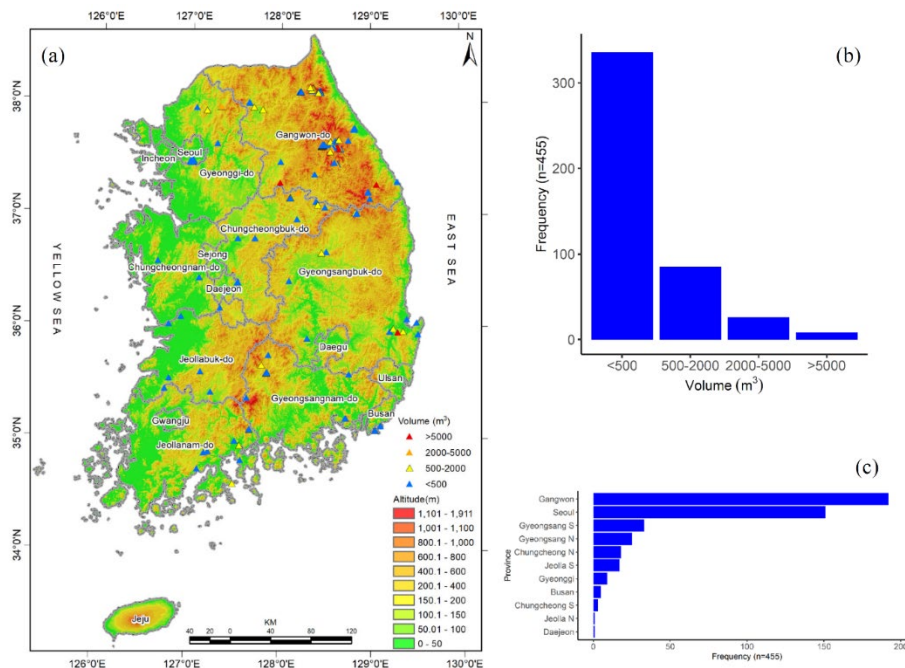

211  
212 **Figure 1.** (a) The distribution of RFI in South Korea, (b) Histogram of RFI debris volume,  
213 and (c) Province-wise RFI debris frequency distribution (Data source: elevation data  
214 acquired from NGII, 2018).  
215

Table 1: The detailed description of continuous and categorical variables.

| Causative factors                             | Variables                  | Type                                                                                       | Importance                                                                                                                                                                 |
|-----------------------------------------------|----------------------------|--------------------------------------------------------------------------------------------|----------------------------------------------------------------------------------------------------------------------------------------------------------------------------|
| Rainfall                                      | Continuous hourly rainfall | Continuous                                                                                 | Triggering factor and effect on soil moisture (Ngo et al., 2021)                                                                                                           |
|                                               | Three hours rainfall       |                                                                                            |                                                                                                                                                                            |
|                                               | Six hours rainfall         |                                                                                            |                                                                                                                                                                            |
|                                               | Nine hours rain            |                                                                                            |                                                                                                                                                                            |
|                                               | Twelve hours rain          |                                                                                            |                                                                                                                                                                            |
|                                               | One day rain               |                                                                                            |                                                                                                                                                                            |
|                                               | Three days rain            |                                                                                            |                                                                                                                                                                            |
|                                               | Seven days rain            |                                                                                            |                                                                                                                                                                            |
|                                               | Two weeks rain             |                                                                                            |                                                                                                                                                                            |
|                                               | Three weeks rain           |                                                                                            |                                                                                                                                                                            |
|                                               | Four weeks rain            |                                                                                            |                                                                                                                                                                            |
| Soil                                          | Soil depth (cm)            | Categorical<br>1) <20, 2) 20-50, 3) 50-100                                                 | Permeability, infiltration, surface runoff, and soil strength affect slope stability (Meena et al., 2022)                                                                  |
|                                               | Soil type                  | Categorical<br>1) Sandy loam, 2) Silt loam, 3) Lithosol, 4) Clay                           |                                                                                                                                                                            |
| Forest features                               | Leafage                    | Categorical<br>1) Broad-leaved, 2) Mixed, 3) Pines                                         | Effect on slope stability i.e., vegetation roots cause more stability (Ngo et al., 2021)                                                                                   |
|                                               | Size of wood               | Categorical<br>1) No tree, 2) Small, 3) Average, 4) Large                                  |                                                                                                                                                                            |
|                                               | Age of tree                | Categorical<br>1) No tree, 2) 1-5, 3) 5-15, 4) 15-25, 5) 25-35, 6) 35-45, 7) 45-60, 8) >60 |                                                                                                                                                                            |
|                                               | Forest density             | Categorical<br>1) No tree, 2) Low, 3) Medium, 4) High                                      | It reflects the inhibitory effect of landslide occurrence (Huang et al., 2020)                                                                                             |
|                                               | Forest Fire history        | Categorical<br>1) No, 2) Yes                                                               | Effect on soil erosion                                                                                                                                                     |
| Topographical and geomorphological parameters | Slope (degree)             | Continuous                                                                                 | Effect on infiltration process, shear stress, and gravity. Landforms with a steep slope and high slope length are usually more susceptible to collapse (Pham et al., 2018) |
|                                               | Slope length (m)           | Continuous                                                                                 |                                                                                                                                                                            |
|                                               | Slope aspect               | Categorical (8 directions)<br>North, Northeast, south, East,                               | Effect on rainfall, soil moisture, and vegetation cover (Dahal et al., 2008 )                                                                                              |

| Causative factors | Variables    | Type                                         | Importance                                                                                        |
|-------------------|--------------|----------------------------------------------|---------------------------------------------------------------------------------------------------|
|                   |              | Southeast, South, Southwest, West, Northwest |                                                                                                   |
|                   | Altitude (m) | Continuous                                   | Effect on rainfall, vegetation cover, and soil depth (Raja et al., 2017)                          |
|                   | Drainage     | Categorical<br>1) Bad, 2) Good, 3) Very good | Effect on water flow, saturation, soil moisture, and valley landslides (Shahabi and Hashim, 2015) |

Table 2. Summary statistics of continuous variables.

| Variables                  | Observation | Min  | Mean    | Median | Max   | SD      | unit   |
|----------------------------|-------------|------|---------|--------|-------|---------|--------|
| Maximum hourly rainfall    | 455         | 0    | 48.2    | 48     | 78.5  | 20.262  | mm     |
| Continuous hourly rainfall | 455         | 0    | 285.341 | 327    | 549.5 | 106.279 |        |
| Three hours rainfall       | 455         | 0    | 87.716  | 79.5   | 171   | 60.166  |        |
| Six hours rainfall         | 455         | 0    | 114.381 | 89     | 240.5 | 79.493  |        |
| Nine hours rainfall        | 455         | 0    | 136.317 | 95     | 284.5 | 85.988  |        |
| Twelve hours rainfall      | 455         | 0    | 150.161 | 99     | 447   | 95.431  |        |
| One-day rainfall           | 455         | 0    | 201.598 | 162    | 538.5 | 111.62  |        |
| Three-days rainfall        | 455         | 0    | 279.6   | 283.5  | 549.5 | 85.875  |        |
| Seven-days rainfall        | 455         | 0.5  | 323.16  | 330    | 633.5 | 87.895  |        |
| Two-weeks rainfall         | 455         | 0.5  | 385.033 | 399.5  | 663   | 89.754  |        |
| Three-weeks rainfall       | 455         | 85.5 | 503.989 | 533    | 914.4 | 114.888 |        |
| Four-weeks rainfall        | 455         | 108  | 586.585 | 561    | 1135  | 159.945 |        |
| Slope                      | 455         | 10   | 34.004  | 34.004 | 65    | 7.938   | Degree |
| Slope length               | 455         | 1.8  | 21313   | 13     | 180   | 22.623  | m      |
| Altitude                   | 455         | 9    | 390.789 | 272    | 1324  | 273.069 | m      |

**Comment 8:** Why these four machine learning methods were chosen. These methods have become very common. Please simplify the principle of the methods. Model inputs and parameters need to be given.

**Response:** Thank you for your comment. The rationale behind selecting POLR, RF, SVM, and EGB for predicting landslide-induced debris is rooted in their widespread adoption and demonstrated success in predictive modeling tasks, including those involving complex relationships in data. Their common use in the landslide susceptibility modeling adds credibility to our approach. To simplify the principles of these methods, we have thoroughly revised section 3 in the revised manuscript as follows:

‘In the modeling process, the model choice is based on the distribution of the data and the type of outcome variable. For continuous outcome variables, continuous distributions are



adopted after the assumptions constrained on the model are satisfied. The choice of categorical outcome variable depends on the number of categories (levels) and their order. For the case of two categories, the appropriate model is found in binary models, while the multi-level models are adopted when the outcome variable has more than two level categories. Multi-level models are divided into unordered models, which deal with outcome that has no inherent order and ordered models, which deal with data involving multiple ordered outcomes. In the present study, concerning the prediction of the volume of RFIL debris, the outcome variable was ordered; thus, POLR was chosen after verification of proportional odd assumptions (McCullagh 1980; McNulty 2021). The POLR has a feature of visualizing the effect of each independent variable in the output. The high prediction accuracy of RF, SVM, and EGB in a classification problem, these last three models were widely used as alternative models for predicting landslide susceptibility (Biau and Scornet, 2016; Lechner and Okasa, 2020; Lee et al., 2017; Noble, 2006; Chang et al., 2018; Georganos et al., 2018). Therefore, the four models were applied to evaluate the relationship between various influencing & triggering factors and RFIL debris volume. Detailed objectives of this study were: 1) to collect data of RFIL inventory, triggering and influencing factors; 2) to conduct exploratory data analysis to understand the relationship between RFIL debris volume and independent variables; 3) to predict the RFIL debris volume based on the triggering and influencing factors using suggested models; and 4) to conduct model effectiveness, model comparison using predictive accuracy and the value of kappa. The overall methodology is depicted in Figure 2'

Additionally, model input and parameters are now incorporated into Tables 1 and 2 in the revised manuscript.

## References

- Biau, G., Scornet, E., 2016. A random forest-guided tour. *Test*, 25(2), 197-227.
- Causes, L., 2001. *Landslide types and processes*. US Geological Survey: Reston, VA, USA.
- Chang, Y. C., Chang, K. H., Wu, G. J., 2018. Application of eXtreme gradient boosting trees in the construction of credit risk assessment models for financial institutions. *Applied Soft Computing*, 73, 914-920.
- Coppola, L., Reder, A., Tarantino, A., Mannara, G., Pagano, L., 2022. Pre-failure suction-induced deformation to inform early warning of shallow landslides: Proof of concept at slope model scale. *Engineering Geology*, 106834.
- Crawford, M. M., Bryson, L. S., Woolery, E. W., Wang, Z., 2019. Long-term landslide monitoring using soil-water relationships and electrical data to estimate suction stress. *Engineering Geology*, 251, 146-157.
- Dahal, R. K., Hasegawa, S., Nonomura, A., Yamanaka, M., Masuda, T., Nishino, K., 2008. GIS-based weights-of-evidence modeling of rainfall-induced landslides in small catchments for landslide susceptibility mapping. *Environmental Geology*, 54(2), 311-324.
- Dai, F. C., Lee, C. F., 2001. Frequency–volume relation and prediction of rainfall-induced landslides. *Engineering geology*, 59(3-4), 253-266.

- Georganos, S., Grippa, T., Vanhuysse, S., Lennert, M., Shimoni, M., Wolff, E., 2018. Very high-resolution object-based land use–land cover urban classification using extreme gradient boosting. *IEEE geoscience and remote sensing letters*, 15(4), 607-611.
- Hakim, W. L., Rezaie, F., Nur, A. S., Panahi, M., Khosravi, K., Lee, C. W., Lee, S., 2022. Convolutional neural network (CNN) with metaheuristic optimization algorithms for landslide susceptibility mapping in Icheon, South Korea. *Journal of environmental management*, 305, 114367.
- Huang, F., Chen, J., Du, Z., Yao, C., Huang, J., Jiang, Q., ..., Li, S., 2020. Landslide susceptibility prediction considering regional soil erosion based on machine-learning models. *ISPRS International Journal of Geo-Information*, 9(6), 377.
- Ju, N., Huang, J., He, C., Van Asch, T. W. J., Huang, R., Fan, X., ..., Wang, J. (2020). Landslide early warning, case studies from Southwest China. *Engineering Geology*, 279, 105917.
- Kadavi, P. R., Lee, C. W., Lee, S., 2019. Landslide-susceptibility mapping in Gangwon-do, South Korea, using logistic regression and decision tree models. *Environmental Earth Sciences*, 78(4), 1-17.
- Kim, J. C., Lee, S., Jung, H. S., Lee, S., 2018. Landslide susceptibility mapping using random forest and boosted tree models in Pyeong-Chang, Korea. *Geocarto international*, 33(9), 1000-1015.
- Lacroix, P., Handwerker, A. L., Bièvre, G., 2020. Life and death of slow-moving landslides. *Nature Reviews Earth & Environment*, 1(8), 404-419.
- Lechner, M., Okasa, G., 2020. orf: Ordered Random Forests. R package version 0.1, 3.
- Lee, S. W., Kim, G. H., Yune, C. Y., Ryu, H. J., Hong, S. J., 2012. Development of landslide-risk prediction model thorough database construction. *Journal of the Korean geotechnical society*, 28(4), 23-33.
- Lee, S. W., Kim, G., Yune, C. Y., Ryu, H. J., 2013. Development of landslide-risk assessment model for mountainous regions in eastern Korea. *Disaster advances*, 6(6), 70-79.
- Lee, S., Hong, S. M., Jung, H. S., 2017. A support vector machine for landslide susceptibility mapping in Gangwon Province, Korea. *Sustainability*, 9(1), 48.
- Lee, S. G., Winter, M. G., 2019. The effects of debris flow in the Republic of Korea and some issues for successful risk reduction. *Engineering Geology*, 251, 172-189.
- Lee, S., Lee, M. J., Jung, H. S., Lee, S., 2020. Landslide susceptibility mapping using Naïve Bayes and Bayesian network models in Umyeonsan, Korea. *Geocarto international*, 35(15), 1665-1679.
- Li, Z., Liu, P., Wang, W., Xu, C., 2012. Using support vector machine models for crash injury severity analysis. *Accident Analysis & Prevention*, 45, 478-486.
- Lombardo, L., Opitz, T., Huser, R., 2018. Point process-based modeling of multiple debris flow landslides using INLA: an application to the 2009 Messina disaster. *Stochastic environmental research and risk assessment*, 32, 2179-2198.
- Lombardo, L., Opitz, T., Ardizzone, F., Guzzetti, F., Huser, R., 2020. Space-time landslide predictive modelling. *Earth-Science Reviews*, 209, 103318.
- Lombardo, L., Tanyas, H., Huser, R., Guzzetti, F., Castro-Camilo, D., 2021. Landslide size matters: A new data-driven, spatial prototype. *Engineering Geology*, 293, 106288.
- Malamud, B. D., Turcotte, D. L., Guzzetti, F., Reichenbach, P., 2004. Landslide inventories

- and their statistical properties. *Earth Surface Processes and Landforms*, 29(6), 687-711.
- Marjanović, M., Kovačević, M., Bajat, B., Voženilek, V., 2011. Landslide susceptibility assessment using SVM machine learning algorithm. *Engineering Geology*, 123(3), 225-234.
- McCullagh, P., 1980. Regression models for ordinal data. *Journal of the Royal Statistical Society: Series B (Methodological)*, 42(2), 109-127
- McNulty, K., 2021. *Handbook of Regression Modeling in People Analytics: With Examples in R and Python*. Chapman and Hall/CRC.
- Meena, S. R., Puliero, S., Bhuyan, K., Floris, M., Catani, F., 2022. Assessing the importance of conditioning factor selection in landslide susceptibility for the province of Belluno (region of Veneto, northeastern Italy). *Natural hazards and earth system sciences*, 22(4), 1395-1417.
- Negi, H. S., Kumar, A., Rao, N. N., Thakur, N. K., Shekhar, M. S., 2020. Susceptibility assessment of rainfall-induced debris flow zones in Ladakh–Nubra region, Indian Himalaya. *Journal of Earth System Science*, 129(1), 1-20.
- NGII, 2018. Digital elevation model, NGII (National Geographical Information Institute), the Ministry of Land, Infrastructure and Transport, Korea.
- Ngo, P. T. T., Panahi, M., Khosravi, K., Ghorbanzadeh, O., Kariminejad, N., Cerda, A., Lee, S., 2021. Evaluation of deep learning algorithms for national scale landslide susceptibility mapping of Iran. *Geoscience Frontiers*, 12(2), 505-519.
- Panahi, M., Gayen, A., Pourghasemi, H. R., Rezaie, F., Lee, S., 2020. Spatial prediction of landslide susceptibility using hybrid support vector regression (SVR) and the adaptive neuro-fuzzy inference system (ANFIS) with various metaheuristic algorithms. *Science of the Total Environment*, 741, 139937.
- Park, S., Choi, C., Kim, B., Kim, J., 2013. Landslide susceptibility mapping using frequency ratio, analytic hierarchy process, logistic regression, and artificial neural network methods at the Inje area, Korea. *Environmental earth sciences*, 68(5), 1443-1464.
- Park, S., Kim, J., 2019. Landslide susceptibility mapping based on random forest and boosted regression tree models, and a comparison of their performance. *Applied Sciences*, 9(5), 942.
- Peruccacci, S., Brunetti, M. T., Gariano, S. L., Melillo, M., Rossi, M., & Guzzetti, F., 2017. Rainfall thresholds for possible landslide occurrence in Italy. *Geomorphology*, 290, 39-57.
- Pham, B. T., Tien Bui, D., Prakash, I., 2018. Bagging-based support vector machines for spatial prediction of landslides. *Environmental Earth Sciences*, 77(4), 1-17.
- Raja, N. B., Çiçek, I., Türkoğlu, N., Aydın, O., Kawasaki, A., 2017. Landslide susceptibility mapping of the Sera River Basin using the logistic regression model. *Natural Hazards*, 85(3), 1323-1346.
- Ritchie, A. M. (1958). Recognition and identification of landslides. *Landslides and Engineering Practice, Highway Research Board Special Report*, 29, 48-68.
- Sameen, M. I., Pradhan, B., Lee, S., 2020. Application of convolutional neural networks featuring Bayesian optimization for landslide susceptibility assessment. *Catena*, 186,

104249.

- Sarkar, R., Dorji, K., 2019. Determination of the probabilities of landslide events—a case study of Bhutan. *Hydrology*, 6(2), 52.
- Segoni, S., Piciullo, L., Gariano, S. L., 2018. A review of the recent literature on rainfall thresholds for landslide occurrence. *Landslides*, 15(8), 1483-1501.
- Shahabi, H., Hashim, M. 2015. Landslide susceptibility mapping using GIS-based statistical models and Remote sensing data in tropical environment. *Scientific reports*, 5(1), 9899.
- Shirzadi, A., Shahabi, H., Chapi, K., Bui, D. T., Pham, B. T., Shahedi, K., Ahmad, B. B., 2017. A comparative study between popular statistical and machine learning methods for simulating volume of landslides. *Catena*, 157, 213-226.
- Takara, K., Yamashiki, Y., Sassa, K., Ibrahim, A. B., & Fukuoka, H., 2010. A distributed hydrological–geotechnical model using satellite-derived rainfall estimates for shallow landslide prediction system at a catchment scale. *Landslides*, 7(3), 237-258.
- Taylor, F. E., Tarolli, P., Malamud, B. D., 2020. Preface: Landslide–transport network interactions. *Natural Hazards and Earth System Sciences*, 20(10), 2585-2590.
- Van Tien, P., Luong, L. H., Duc, D. M., Trinh, P. T., Quynh, D. T., Lan, N. C.,..., Loi, D. H., 2021. Rainfall-induced catastrophic landslide in Quang Tri Province: the deadliest single landslide event in Vietnam in 2020.
- Wang, B., Vardon, P. J., & Hicks, M. A. (2016). Investigation of retrogressive and progressive slope failure mechanisms using the material point method. *Computers and Geotechnics*, 78, 88-98.
- Winter, M. G., 2020. Debris flows. Geological Society, London, Engineering Geology Special Publications, 29(1), 163-185.
- Woo, C., Kwon, H., Lee, C., Kim, K., 2014. Landslide hazard prediction map based on logistic regression model for applying in the whole country of South Korea. *Journal of the Korean Society of Hazard Mitigation*, 14(6), 117-123.
- Zhao, Y., Wang, R., Jiang, Y., Liu, H., Wei, Z., 2019. GIS-based logistic regression for rainfall-induced landslide susceptibility mapping under different grid sizes in Yueqing, Southeastern China. *Engineering Geology*, 259, 105147.
