# Supplementary material for: Prediction of landslide induced debris’ severity using machine learning algorithms: a case of South Korea
Source: Copernicus journal article supplement (doi:10.5194/nhess-2023-73), 2023-06-08
Supplement: Supplementary file [file nhess-2023-73-RC1-supplement.pdf]

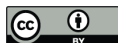

1 **Prediction of landslide induced debris' severity using machine learning**  
2 **algorithms: a case of South Korea**

3

4 Tuganishuri Jérémie<sup>1</sup>, Chan-Young Yune<sup>2</sup>, Gihong Kim<sup>3</sup>, Seung Woo Lee<sup>4</sup>,  
5 Manik Das Adhikari<sup>5</sup>, Sang-Guk Yum<sup>6\*</sup>

6

7 <sup>1</sup> Department of Civil and Environmental Engineering, Gangneung-Wonju National  
8 University, Gangneung, Gangwon-do, Republic of Korea, [tugan.miya@gmail.com](mailto:tugan.miya@gmail.com)

9 <sup>2</sup> Department of Civil and Environmental Engineering, Gangneung-Wonju National  
10 University, Gangneung, Gangwon-do, Republic of Korea, [yune@gwnu.ac.kr](mailto:yune@gwnu.ac.kr)

11 <sup>3</sup> Department of Civil and Environmental Engineering, Gangneung-Wonju National  
12 University, Gangneung, Gangwon-do, Republic of Korea, [ghkim@gwnu.ac.kr](mailto:ghkim@gwnu.ac.kr)

13 <sup>4</sup> Department of Civil and Environmental Engineering, Gangneung-Wonju National  
14 University, Gangneung, Gangwon-do, Republic of Korea, [swl@gwnu.ac.kr](mailto:swl@gwnu.ac.kr)

15 <sup>5</sup> Department of Civil and Environmental Engineering, Gangneung-Wonju National  
16 University, Gangneung, Gangwon-do, Republic of Korea, [rsgis.manik@gmail.com](mailto:rsgis.manik@gmail.com)

17 <sup>6</sup> Department of Civil and Environmental Engineering, Gangneung-Wonju National  
18 University, Gangneung, Gangwon-do, Republic of Korea, [skyeom0401@gwnu.ac.kr](mailto:skyeom0401@gwnu.ac.kr)

19

20 *\*Corresponding author: Sang-Guk Yum; [skyeom0401@gwnu.ac.kr](mailto:skyeom0401@gwnu.ac.kr)*

21

22

23

24

25

26

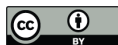

27 **Prediction of landslide induced debris' severity using machine learning**  
28 **algorithms: a case of South Korea**

29 **Abstract**

30 Rainfall-induced landslides frequently occur in the mountainous region of Korean peninsula.  
31 The resulting landslide induced debris cause extreme property damages, huge financial losses  
32 and human deaths. To mitigate their effect different landslide susceptibility mapping are  
33 frequently used. However, these methods do identify regions with potential landslides but they  
34 do not quantify their severity. In this paper multi-category ordered machine models, namely,  
35 proportional odd logistic regression (POLR), random forest (RF), support vector machine  
36 (SVM), and extreme gradient boosting (EGB) methods, are proposed to fill the specified gap.  
37 Moreover, the exploratory data analysis on landslide induced debris's dataset has been  
38 conducted on to examine patterns and relationship between landslide-induced debris  
39 severity(size), causal factors(rainfall) and influencing factors. Findings revealed that  
40 cumulative three days' rainfall and slope length were most responsible for the severity of  
41 landslide-originated debris severity and slopes between 20° to 40° was identified as most  
42 vulnerable region. Furthermore, the predictive accuracy statistics were compared to assess the  
43 suitable model for debris severity for Korean case. The RF and EGB ranked higher with an  
44 overall accuracy of 90.07% and 86.09% and kappa of 0.72 and 0.61 on the validation set,  
45 respectively. The findings of this research may be useful in the identification of high risk zones  
46 for extreme rainfall-induced debris to elaborate mitigation and resilience policies, post-disaster  
47 rehabilitation planning and land use management.

48

49 Keywords: Rainfall-induced debris Severity; Proportional odd logistic regression; Random  
50 forest; Support vector machine; Extreme gradient boosting; Machine learning , South Korea

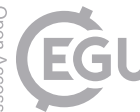

51 **1. Introduction**

52 Rainfall-induced debris is a natural phenomenon that occurs when the slope fails due to the  
53 saturation of soil after the rainfall exceeds a certain threshold (Au 1998; Takara et al. 2010;  
54 Peruccacci et al. 2017; Segoni et al. 2018; Crawford et al. 2019; Coppola et al. 2022).  
55 Rainwater penetrates the soil through cracks or pores (Zeng et al. 2022) which destabilizes the  
56 slope and induces landslides (Franzluebbers 2002). Furthermore, the volume of landslide-  
57 induced debris depends on the geological condition of the terrain, rainfall intensity and duration  
58 (Chang et al. 2011). Extreme rainfall is the triggering factor for landslides which is one of the  
59 most damaging natural disasters with the expensive cost of repair and indemnification  
60 (Kockelman 1986; Gariano and Guzzetti 2016). In addition, heavy windstorms, typhoons, and  
61 extensive rainfall have destroyed many properties and taken many human lives yearly (Liu et  
62 al. 2018). Furthermore, landslides have caused enormous environmental degradation,  
63 infrastructure damage, casualties, and loss of life, which disturb the socio-economic aspect of  
64 the community (Li et al. 2012; Sarkar and Dorji 2019; Zhao et al. 2019; Taylor et al. 2020;  
65 Lacroix et al. 2020; Winter 2020; Negi et al. 2020; Ju et al. 2020; Van et al. 2021). Most rainfall-  
66 induced landslides were found to be shallow (de Jesús et al. 2019; Liu et al. 2021; Chang et al.  
67 2021) however, some were very extreme and resulted in severe human and financial damage  
68 (Turner, 2018; Meena et al., 2021). Klose et al. (2016) found that from 1980 to 2013, landslides  
69 took thousands of lives and an annual average of about \$20 billion of economic losses, which  
70 was 17% of the total (\$121 billion) annual mean of global disaster-induced losses.

71 The Korean peninsula is characterized by mountainous, which makes it more prone to  
72 rainfall-induced landslides (Lee et al. 2013). Lee et al. (2012) found that the triggering factor  
73 for landslides was short-duration heavy rainfall. Park et al. (2013) reported that the annual  
74 property damage caused by rainfall-induced landslides in South Korea averaged between  
75 US\$500M to US\$1000M and approximately 36 human deaths per year from 1997 to 2010.



76 Therefore, to mitigate the effect of landslides in South Korea, different studies have been  
77 carried out on landslide assessment (Kadavi et al. 2019; Lee and Winter 2019; Sameen et al.  
78 2020; Panahi et al. 2020; Hakim et al. 2022). Lee et al. (2020) applied the Naïve and Bayesian  
79 Networks model for landslide susceptibility mapping in Umyeon Mountain. Lee et al. (2012)  
80 used physical slope and probabilistic model, i.e., decision trees and logistic regression for  
81 landslide susceptibility mapping in Gangwon-do. Lee et al. (2013) developed the binary  
82 logistic regression model for predicting the occurrence of landslides. Woo et al. (2014)  
83 constructed a landslide hazard map using binary logistic regression. Park and Kim (2019)  
84 compared boosted trees and random forest model's performance in landslide susceptibility  
85 mapping for Umyeon Mountain; the same methods were previously applied at Pyeong-Chang  
86 by Kim et al. (2018). It was observed that the objectives of previous studies were to predict  
87 landslide susceptibility; they did not specify how severe the occurring landslides would be.  
88 Further, most of studies were performed on a small scale and only predicted the occurrence,  
89 not the size. Therefore, in the present study, we analyzed landslide-induced debris severity  
90 based on the causative variables and influencing factors. This study is novel in expressing the  
91 relationship of debris' severity, causative and influencing factors. It is an extension on landslide  
92 mapping which quantifies the magnitude of landslide-induced debris. The quantification of  
93 debris severity may be useful in land management by highlighting regions prone to higher  
94 rainfall-induced debris to know whether economic activities that may be carried out on the  
95 given region may not be vulnerable to extreme landslide hazards. The severity of debris is  
96 measured in unit of volume ( $m^3$ ) and classified as shallow(below  $500m^3$ ), small( $500-2000m^3$ ),  
97 medium ( $2000-5000m^3$ ) and critical, i.e., above  $5000m^3$ . Words severity of debris, debris  
98 volume or size of debris express the same quantity in different ways and are used  
99 interchangeably in this manuscript.

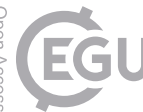

100 **2. Study region**

101 Korean peninsula is located in the northern hemisphere, between China and Japan in Northeast  
102 Asia. Its climate has continental and oceanic features with wide temperature differences. The  
103 yearly mean temperature ranges from 10°C to 16°C, that is, from -6°C to 7°C in winter and  
104 23°C to 27°C in summer. In South Korea, the rainy season range from June to September, with  
105 1000mm to 1800mm of precipitation in the southern part and 1100 to 1400mm in the central  
106 region (<https://web.kma.go.kr/>).

107 The altitude ranges from 0 to 1911 meters, with mount Halla (in Jeju Island) being the  
108 highest peak in South Korea. The Gangwon Province is the most mountainous region of about  
109 64% of all tallest mountains in Korea, that is, 23 of 36 mountains. The surface geology of the  
110 Korean peninsula is mostly composed of igneous, sedimentary, and metamorphic rock (Chough  
111 et al., 2000). The arable soil depth varies between 1 to 2m (Lee and Winter, 2019). Due to the  
112 high intensity rainfall and weak geological formation in the mountainous region causes high  
113 frequency of landslides. Figure 1(a) illustrates the distribution of landslides by the volume of  
114 landslides, while subplots (b & c) exhibited the relationship of slope length, altitude, and  
115 rainfall with the landslide size.

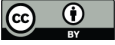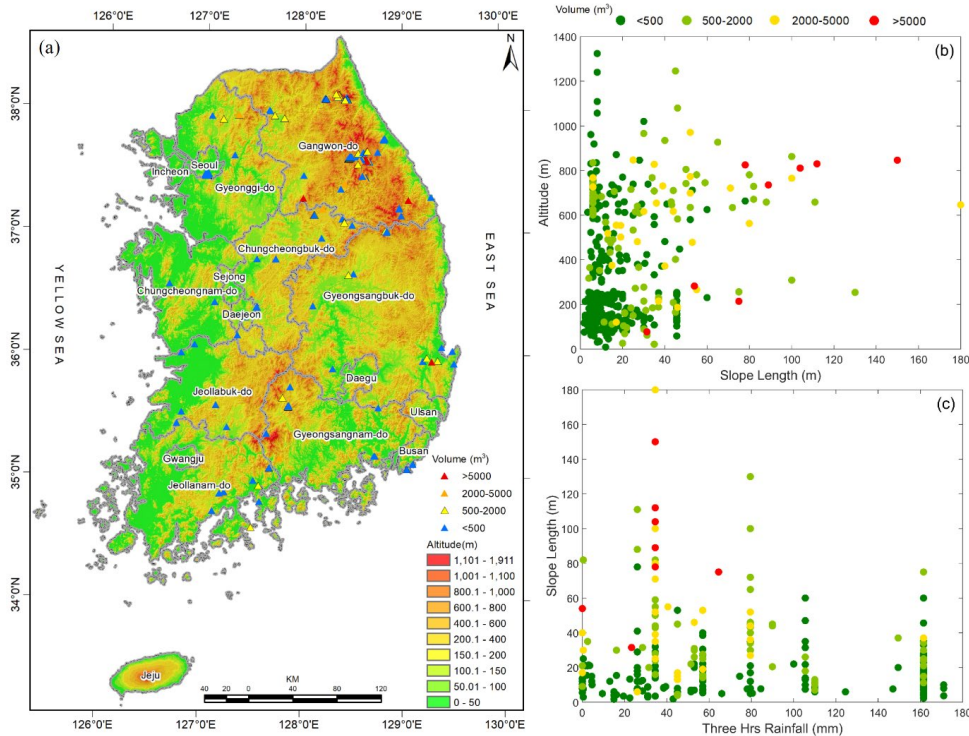

116

117 Figure 1. (a) Landslide location in South Korea, (b) Distribution of landslide volume per  
118 slope length and altitude, and (c) Distribution of landslide volume per slope length  
119 and rainfall (Data source: elevation data acquired from NGII, 2018).

### 120 3. Methodology

#### 121 3.1. Problem formulation

122 Predictive models that deal with multi-variate random variables were investigated to  
123 predict the severity of rainfall-induced landslides. Among those predictive models,  
124 proportional odd logistic regression and other machine learning-based algorithms such as  
125 extreme gradient boosting, random forest, and support vector machine are widely used to deal  
126 with classification problems (Marjanović et al. 2011; Lee et al. 2012; Woo et al. 2014; Wang et  
127 al. 2022a). The main steps for the modeling process were to analyze the interaction of variables



128 that influence the severity of landslides with results in a higher size of debris. For the purposes,  
129 four machine learning models i.e., POLR, RF, SVM, and EGB, were used to assess the most  
130 suitable predictive model for landslide-induced debris in south Korea (;Su et al.,2022). The  
131 comparison was made using predictive accuracy and the value of *kappa*. Figure 2 shows the  
132 steps followed in the construction of the model.

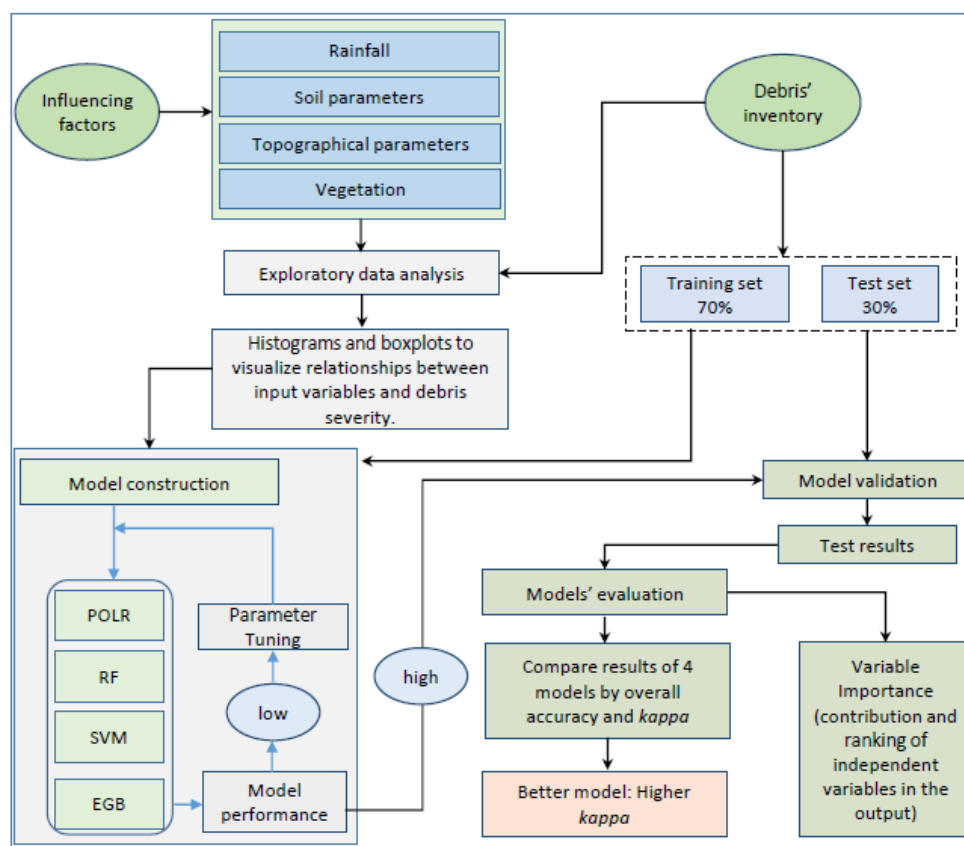

133  
134 **Figure 2.** Modelling workflow process for the prediction of landslide induced debris' severity  
135 using machine learning algorithms.

### 136 3.2. Data description

137 The dataset contains 455 debris inventory collected from field surveys with the help of

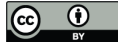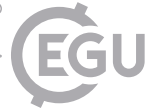

138 portable GPS, a laser ranger and a clinometer. Variable definitions and descriptions for each  
139 feature in the dataset are presented in Table 1. The rainfall data were collected from Korea  
140 meteorological Administration stations scattered around the country nearest each landslide-  
141 induced debris site. It was revealed that the duration and quantity of rainfall directly affect  
142 landslides (Berti et al. 2012; Kim et al. 2014; Sarkar et al. 2019; Liu et al. 2020; Ngo et al.  
143 2021). Rainfall data were grouped into twelve variables: cumulative rainfall, continuous hourly  
144 rainfall, three hours, six hours, nine hours, twelve hours, one day, three days, seven days, two  
145 weeks, three weeks, and four weeks' rainfall. Different measures of rainfall were captured due  
146 to the time-dependent cumulative effect of rainfall on the slope stability, and prolonged rainfall  
147 has a more damaging effect in mountainous regions (Baum and Godt 2010; Hidalgo et al. 2017;  
148 Meena et al. 2022). The conditioning factors, i.e., soil type, topsoil depth, altitude, slope, slope-  
149 length, slope aspect, and vegetation (leafage, size of tree, age of trees, and fire history), were  
150 collected. The soil type was classified as sandy loam, lithosols, silt loam, and clay. The soil  
151 depth was grouped into below 20 centimeters, between 20-50, and 50-100 centimeters. The  
152 rainfall infiltrating the topsoil causes saturation, which initiates the landslide and then results  
153 in debris flow (Baum and Godt 2010;Vahedifard et al., 2017; Zhu and Zhang 2019). The anti-  
154 erosive drainage presence and status were categorized into: very good, good, and bad. Drainage  
155 channels reduces the concentration of water in soil and effect on water flow, saturation, soil  
156 moisture, and valley landslides(Shahabi and Hashim 2015). The vegetation-covered and  
157 necked lands have different affect of landslide (Lee et al. 2013; Ozioko and Igwe 2020;Huang  
158 et al. 2021). The foliage information was classified into pines, broad-leaved, and mixture, while,  
159 the size of trees was classified as large, small, and medium. The age of trees was grouped into  
160 seven classes viz. 1-5 5-15, 15-25, 25-35, 35-45 and >45 years. The forest fire history was also  
161 considered as a influencing factor due to its erosive nature(Huang et al. 2020). Geographical  
162 features were found to contribute to the severity of landslides at different levels; steep slopes



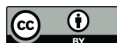

163 were found to fail as the intensity of the rainfall increased (Brand et al. 1984; Au 1998; Charles  
164 and Shi 1998; Nandi and Shakoor 2008; Pham et al. 2018; Chen et al. 2020). It was also noted  
165 that plane areas beneath steep slopes face the damage caused by debris flowing from the top of  
166 mountains (Raja et al. 2017, Wang et al. 2022b).

167

168 The output variable (volume) of landslides has been classified into four categories, i.e.,  
169 below  $500\text{m}^3$ , between  $500\text{-}2000\text{m}^3$ ,  $2000\text{-}5000\text{m}^3$ , and above  $5000\text{m}^3$ (Fig. 4c). There are  
170 different types of landslides; which are classified based on the cause or shape after occurrence  
171 (Causes 2001). Landslides may result from liquefaction, earthquakes, intense surface water  
172 flow due to precipitation, underground water, ice melting, human activities, tectonic  
173 movements etc.( Alexander 1992; Causes, 2001; van der Beek, 2021;McColl 2022). In this  
174 paper, we only considered landslide-induced debris originating from rainfall. Table 1  
175 summarizes the characteristics of debris: its types, frequency and size.

176 Table 1: Landslide-induced debris types and frequency

| Destroyed area \ Volume ( $\text{m}^3$ ) | <500 | 500-2000 | 2000-5000 | >5000 | Total |
|------------------------------------------|------|----------|-----------|-------|-------|
| valley erosion                           | 1    | 1        | 1         |       | 3     |
| falling rocks                            | 1    |          |           |       | 1     |
| mixed/ complexes                         | 3    | 2        | 1         |       | 6     |
| slope                                    | 1    | 1        |           | 1     | 3     |
| scour                                    | 1    |          |           |       | 1     |
| curved wedges                            | 4    | 1        |           |       | 5     |
| a circular arc                           | 205  | 45       | 14        | 2     | 266   |
| Plane                                    | 120  | 35       | 10        | 5     | 170   |
| Total                                    | 336  | 85       | 26        | 8     | 455   |

### 177 3.3 Exploratory data analysis

178 The relationship between the influencing factors and the debris size were analyzed. We  
179 consider categorical variables, also known as qualitative set of information, that is divided into  
180 groups. It describes data which are non-numerical and serve qualitative purposes, such as



181 representing a certain value or distinctive character of objects (nominal), when there is no order  
182 in levels and ordinal when there is an order in the dataset (Bilder and Loughin 2014). In addition,  
183 continuous features were presented in form of histograms and boxplots to analyze the  
184 dispersion and influence on the size of debris. Figure 3 illustrates that most of the occurred  
185 debris was shallow (below 500m<sup>3</sup>, 73.85%), followed by 500-2000m<sup>3</sup> (18.68%), and the  
186 extreme debris (above 5000m<sup>3</sup>) was the least frequent (1.76%). Debris with a size above  
187 5000m<sup>3</sup> was mainly associated with sandy loam soil of depth above 20cm and a non-perfected  
188 drainage system, where the forest density was medium and in a place that experienced wildfire.  
189 The region with pines leafage experienced shallower debris compared to other types of leafage.  
190 The region with older trees, above 45 years of age, experienced more severe debris than  
191 younger forests. Šilhán and Stoffel (2015) highlighted that the area with timber age of above  
192 45years were more sensitivity to landslide occurrences. The size of debris for wildfire-  
193 experienced regions was observable; compared to the frequency of cases with no wildfire  
194 history, the severity was quite higher. The wildfire influence on the rainfall-induced debris is  
195 due to the reduced infiltration of water into the soil, which increases the erodibility of soil  
196 (Ranger et al. 2020; Tiwari et al. 2020). The inadequate drainage system resulted in severe  
197 debris(Popescu 2002), where the system was very good, no severe debris occurred. The  
198 resulting huge number of shallow debris for a very good drainage system is due to the fact  
199 those systems are usually created in the most vulnerable regions and the shallow debris is an  
200 indication of improvement in landslide mitigation.

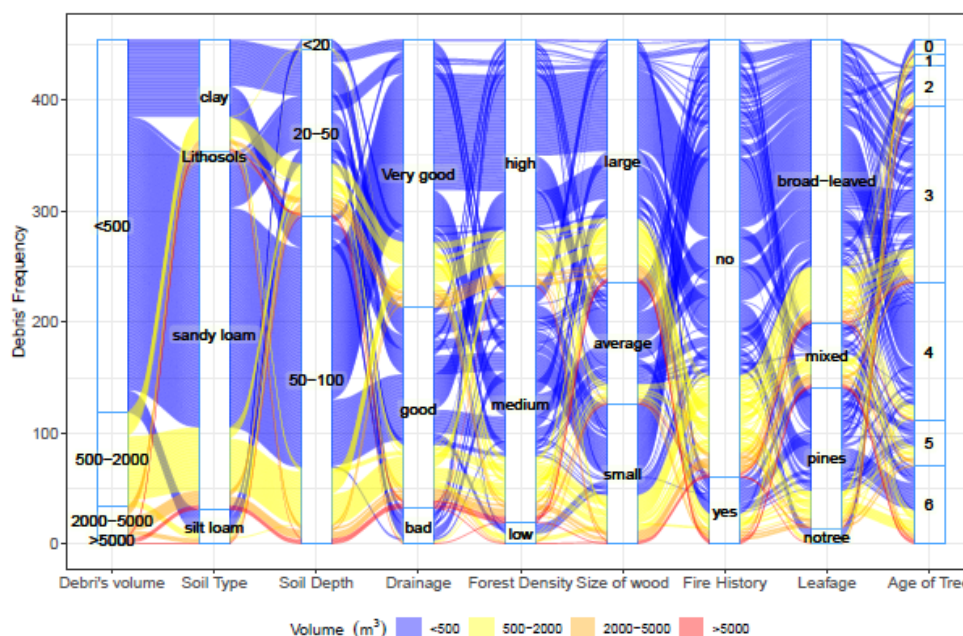

201

202 Figure 3. Interlinkage between the size of debris and categorical influencing factors.

203 Figure 4a illustrates that sandy soil, which totalizes about 70% of all debris, was the  
 204 most vulnerable soil, followed by clay (22%), silt loam (7%) and lithosols (1%). Similarly,  
 205 sandy soil not only ranked higher in terms of frequency but also in terms of size. The high  
 206 sensitivity of sandy soil to rainfall-induced debris may be due to its high coefficient of  
 207 permeability which facilitates fast saturation of topsoil during the rainfall period that induces  
 208 shallow debris (Lee et al. 2013). Overall, about 73.85% of all debris was shallow, that is, below  
 209 500m<sup>3</sup>, 18.68 % (500-2000m<sup>3</sup>) was small, 5.71% (2000-5000m<sup>3</sup>) was medium, and only 1.76%  
 210 were critical, i.e., above 5000m<sup>3</sup>, as depicted in Fig. 4b. Figure 4c, illustrates that about 74%  
 211 of landslide-induced debris occurred in Gangwon and Seoul; this made the two provinces more  
 212 vulnerable than other regions. South and North Gyeongsang provinces ranked third and fourth  
 213 with 7% (25 cases) and 5% (18 cases) of all debris inventory, respectively.

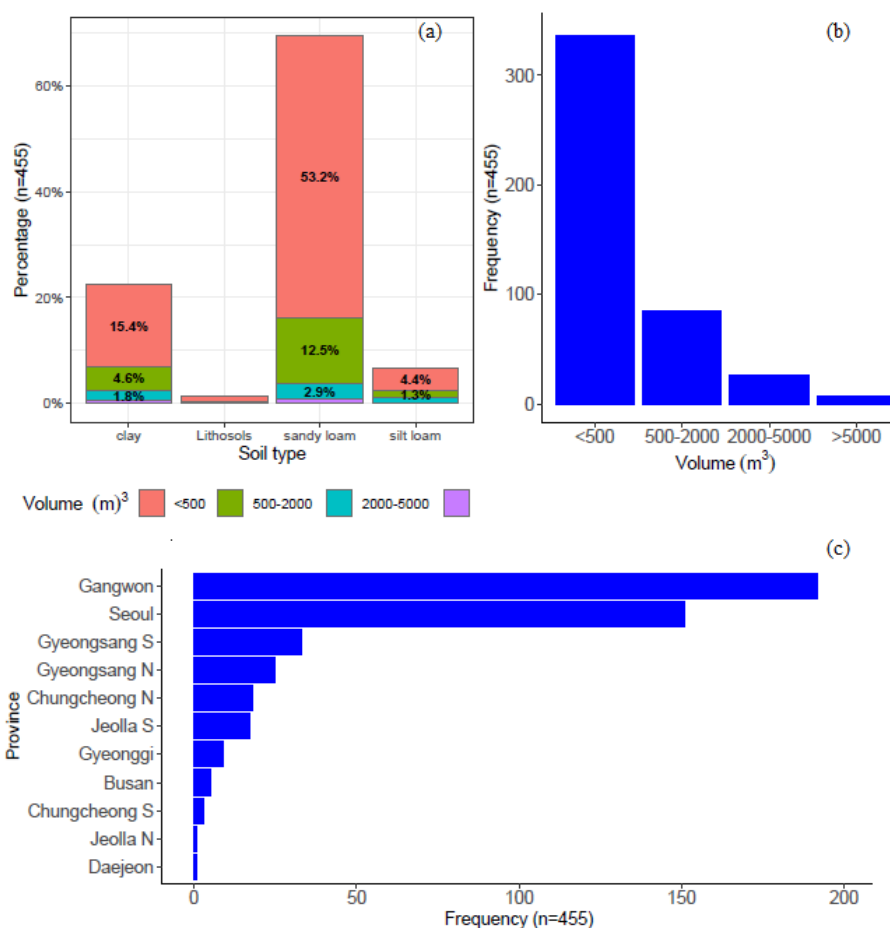

214

215 Figure 4. Distribution of debris: (a) debris' volume (in m<sup>3</sup>) per soil types, (b) debris'  
 216 frequency per volume, and (c) debris' frequency per provinces.

217

218 To examine the relationship between continuous explanatory variables and their effect  
 219 on the size of debris, 3D scatter plots and boxplots were presented (Fig. 5). It was observed on  
 220 the 3D scatterplot that most debris occurred at slope between 20° and 40° (Fig. 5a), this was  
 221 also confirmed by the boxplot (Fig. 5b), where few exceptions were observed for shallow  
 222 debris for clay and sandy soil where debris occurred at small or at very large slope angles as  
 223 outliers. Shallow debris was independent of the slope angle as depicted in Fig.5c; outliers were



224 scattered on all slope angles, and as the size of debris increased, the occurrence converged at  
225 slope between 20° and 40°. There was a pseudo-decreasing trend between altitude and size of  
226 debris (Fig. 5c), the highest altitudes (above 600m) were associated with shallow debris and  
227 critical debris occurred at altitude between 200 and 900m. On the other hand, a quasi-increasing  
228 relationship between size of debris and slope length was observed in all type of soil (Fig. 5d).  
229 Debris below 500m<sup>3</sup> was associated with slope length below 80m, the highest quartile was  
230 about 140m associated with clay soil of above 5000m<sup>3</sup> of debris size.

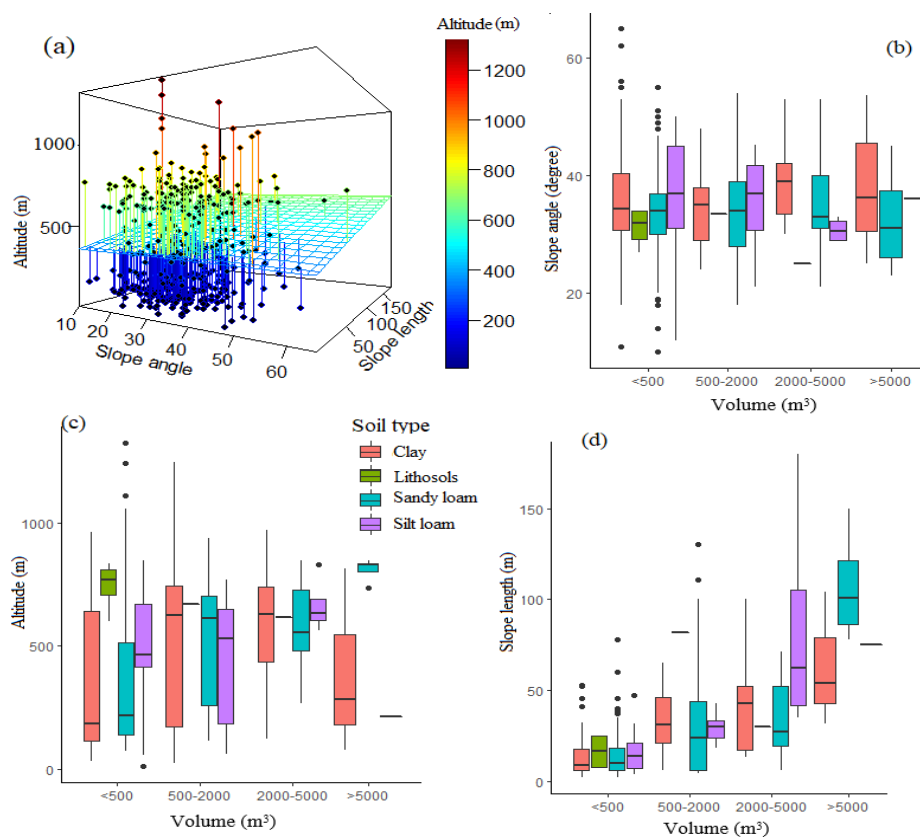

231

232 Figure 5. Distribution of debris and continuous predictors: (a) 3D Scatter plot between altitude,  
233 topographic slope and slope length, (b) boxplot of volume of debris per slope angle and  
234 soil types, (c) boxplot of volume of debris per altitude and soil types, and (d) boxplot of  
235 volume of debris per slope length and soil types.



236           The analysis of the relationship between the size of debris and rainfall over different  
237 time intervals has shown that short time rainfall was associated with shallow debris(fig.6 a-f),  
238 as the cumulative time interval of rainfall increased, the debris size increased and stabilized at  
239 three days cumulative rainfall(Fig. 6g). we observed that the increase in severity of debris was  
240 associated with lower precipitation as reflected in the yellow boxplot for debris above  
241 5000m<sup>3</sup>(Fig. 6. g-f), the precipitation of occurrence was below the corresponding median  
242 rainfall. Therefore the lower precipitation on prolonged time greater or equal to three days was  
243 responsible for severe debris. On the other hand, short-duration heavy rains were responsible  
244 for shallow debris(Polemio and Petrucci 2000).The relationship between shallow debris and  
245 heavy rain was reflected in the boxplot representing debris below 500m<sup>3</sup>(Fig. 6 a-f), where the  
246 interquartile range of precipitation was large.

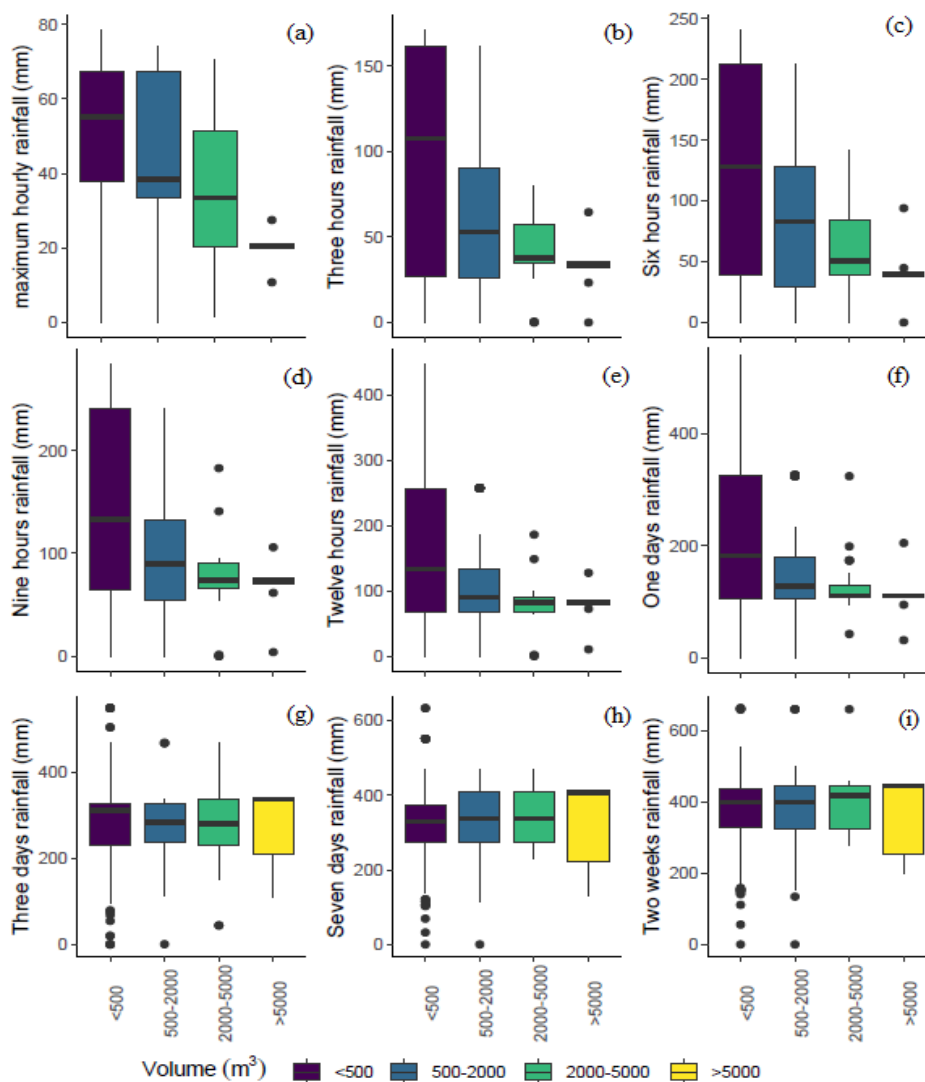

247

248 Figure 6. Distribution of severity of debris per antecedent rainfall grouped in different time  
 249 intervals

250

251 The precipitation at the time of the incident exhibited an inverse relationship between  
 252 the size of debris and rainfall intensity (Fig. 7 a-f). From three days' cumulative of antecedent  
 253 rainfall, the relationship became almost constant in all time-based cumulative rainfall (Fig. 7  
 254 g-h). The rainfall of lower intensity falling over a prolonged period was observed to trigger the



255 large size of rainfall-induced debris (Tang et al. 2017; Rivas et al. 2022). The threshold for the  
256 triggering factor was the rainfall duration of atleast 3days (Chinkulkijniwat et al., 2020;  
257 Rahardjo et al., 2020). In terms of soiltype, clay exhibited shallow debris at lowest  
258 precipitation followed by sandy soil. The median of the occurrence of shallow debris was the  
259 lowest for silt loam compared with other soil types. From three days cumulative rainfall(Fig.  
260 7g), the median of occurrence of all size of debris stabilized around 300mm of precipitation  
261 and clay was more likely to produce severe debris.



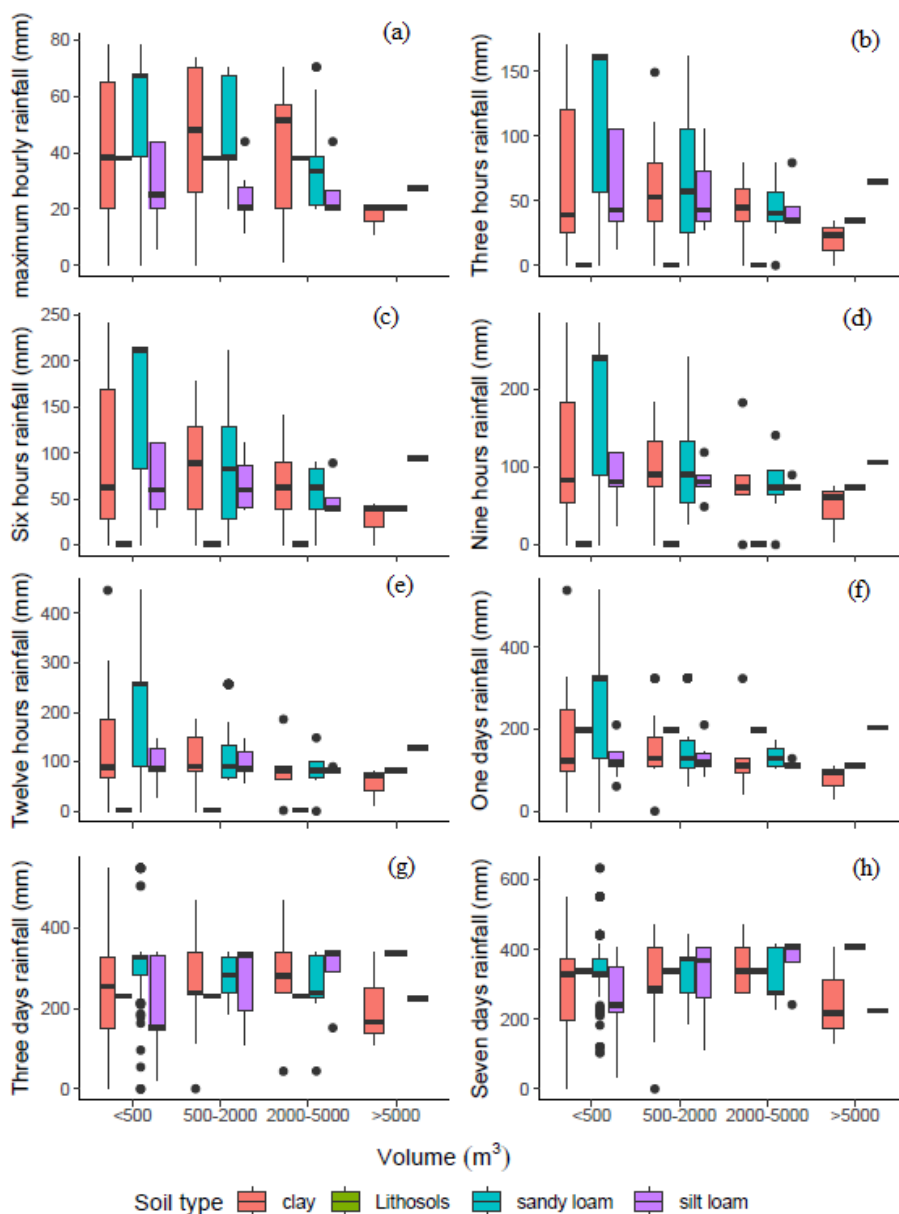

262

263 Figure 7. Relationship between rainfall and the size of debris.

264



265 **3.3. Method Description**

266 The analysis, construction, and evaluation of models were done in the following  
267 chronological order as depicted in Fig. 2. First, the data set was curated: formatting the  
268 variables to match their types, that is, numerical variables into a numerical format, and  
269 categorical variables into factor and ordered factors according to their natural characteristics  
270 (Table 1). Second, the dataset was split into training and test set. Third, the four machine  
271 learning algorithms (Kainthura and Sharma 2022; Su et al.,2022), were applied to the training  
272 and test set on all variables consecutively. Finally, confusion matrices for each method were  
273 generated to compare the performance based on the overall accuracy and *kappa*. The variable  
274 ranking plot was generated to identify the cause of differences in the predictive power of the  
275 four methods.

276 All analyses were done using the following packages in R software: Caret (Max 2022)  
277 for the creation of confusion matrix, dplyr (Wickham et al. 2022) for data manipulation and  
278 formatting, MASS for running proportional odd logistic model, Random Forest for running the  
279 random forest algorithm, Xgboost for running extreme gradient boost, SVM for supporting  
280 vector machine, Ggplot2 (Wickham 2016), alluvial (Brunson 2020) for plotting, and Matrix for  
281 creation of sparse matrix which is used in training extreme gradient boosting.

282 Variable importance is a systematic approach for identifying the contribution of input  
283 variable in the prediction of the outcome variable in the predicative model. For graphical  
284 representation of variable importance (Biecek and Burzykowski 2021), the plot was made using  
285 DALEX libraries (Biecek 2018) and the e1071 package (Meyer et al. 2021) in R (Team 2021).  
286 This plot ranks variables according to its influence on the predictive power of the model.

287 The selected methods for modeling were chosen based on low parsimony and are  
288 frequently applied to ordered outcome problems. The predictive performance for each model  
289 was evaluated using confusion matrix information accuracy and *kappa* (Caelen 2017). The



290 kappa statistic  $k$  measures the agreement between the observed and predicted values to quantify  
291 the ability of the model to classify the output variable into their appropriate classes or categories.  
292 Let both the observed  $Y$  variable and predicted  $Z$  variable have  $g$  categories or levels. Let  $f_{ij}$   
293 be the frequencies of observations in the  $i^{\text{th}}$  categorical output variable  $Y$  and the  $j^{\text{th}}$  category  
294 of the predicted values, then the frequency table known as the confusion matrix can be arranged  
295 as follows:

|     |          |          |     |          |
|-----|----------|----------|-----|----------|
|     | Z=1      | Z=2      | ... | Z=g      |
| Y=1 | $f_{11}$ | $f_{21}$ | ... | $f_{1g}$ |
| Y=2 | $f_{21}$ | $f_{22}$ | ... | $f_{2g}$ |
| ⋮   | ⋮        | ⋮        | ... | ⋮        |
| Y=g | $f_{g1}$ | $f_{2g}$ | ... | $f_{gg}$ |

296

297 The observed (actual values) ratio of agreement between  $Y$  and  $Z$  is expressed as:

298 
$$p_0 = \frac{1}{n} \sum_{i=1}^g f_{ii} \quad (1)$$

299

300 and the expected agreement by chance is defined as:

301 
$$p_e = \frac{1}{n^2} \sum_{i=1}^g f_{i+} f_{+i} \quad (2)$$

302

303 where  $f_{i+}$  is the total for the  $i^{\text{th}}$  row  $f_{+i}$  is the total for the  $i^{\text{th}}$  column. The value of kappa is  
304 the estimate of the population coefficient calculated using the following formula:

305 
$$k = \frac{\text{Pr}[Y=Z] - \text{Pr}[y=z|Y \text{ and } Z \text{ are independent}]}{1 - \text{Pr}[y=z|Y \text{ and } Z \text{ are independent}]} \quad (3)$$

306



307 The confusion matrix is useful for analyses, control tunes of different classifiers, and  
308 identification of a combination of classes with its recognition values or rates (Susmaga 2004).  
309 The confusion matrix is a ( $g \times g$ ) dimension table (matrix) which matches predicted values  
310 from the model vs. actual values from the dataset, where  $g$  stands for levels of the outcome  
311 variable, entries on the diagonal represents the correct classification, and non-diagonal  
312 elements represent misclassification. The accuracy is defined as the ratio of correctly classified  
313 entries and the sum of correctly classified and misclassification. The accuracy of the model is  
314 compared to the value of the No information rate (NIR). The NIR is the baseline for assessing  
315 performance, not 0.5. For the model to be useful (better than random guess), the lower bound  
316 for a 95% confidence interval (CI) of prediction must be greater than NIR (Garson 2021). The  
317 next paragraphs describe each method in detail.

318 The proportional odds logistic model (POLR) (McCullagh 1980) is one of the usefull  
319 methods designed to handle ordered or ranked outcome variables when the outcome categories  
320 (levels) are more than two. This model is constructed based on cumulative probability  
321 distribution (Brant 1990),  $y_j = \Pr(y \leq j)$  and is expressed in the form:

$$322 \quad \text{logit} [y_j / (1 - y_j)] = \theta_j - \beta^t X \quad (4)$$

323 where  $y$  is a set of  $N$  and independent observation taking values  $j = 1, 2, \dots, k$ ,  $X$  is a  
324 vector of independent variables,  $\theta_1 < \theta_2 < \dots < \theta_{k-1}$  and  $\beta^t$  are unknown parameters. To use  
325 ordinal regression, assumptions must be satisfied.

326 To use the proportional odds logistic regression, the proportional odd assumption or the  
327 parallel regression conditions must be satisfied. The first states that no independent variable  
328 has a disproportionate effect on any level of the dependent variable (McNulty 2021). If this  
329 condition is not satisfied, other methods such as adjacent logit models may be used (Agresti,  
330 2010; Harrell, 2015). To test the parallel regression, the Brant-Wald test is used and this test



331 compares the general ordinal logistic regression (with no assumption of proportional odd) with  
332 POLR. It is the test of significance in the difference between the two models, which produces  
333 chi-square statistics. If the p-value of each of the different coefficients of variables in the model  
334 is greater than 0.05, then the parallel regression assumption holds (Brant 1990) or the  
335 assumption is violated otherwise. Binary logistic regression is frequently used for landslide  
336 susceptibility mapping (Yesilnacar and Topal 2005; Yilmaz 2009; Lin et al. 2017; Lombardo and  
337 Mai 2018; Sun et al. 2021), the ordered logistic regression is an extension for binary logistic  
338 applied to solve problems with multilevel ordered outcomes (Brant 1990).

339 The second used method was the Random Forest which is a classification and regression  
340 methods. The RF algorithm (Breiman 2001) is a combination of tree predictors and every tree  
341 is made based on values of random vectors, which are sampled independently using the same  
342 distribution to create all trees of the forest. In this study, the RF classification method (Biau  
343 and Scornet 2016; Lechner and Okasa 2020;) is appropriate due to its capability to handle  
344 multiple outcome-related problems (Diaz-Urriarte and de Andrés 2005). It was applied in  
345 different regions for landslide susceptibility mapping (He et al. 2021; Sun et al. 2021; Huang et  
346 al. 2022).

347 The third used method is SVM, which was widely used for mapping the likelihood of  
348 landslides (Lee et al., 2017). Among the multiple class prediction methods, the SVM method  
349 performed better for protein fold recognition (Ding and Dubchak 2001; Huang and Zhao 2018),  
350 landslide hazard (Hong et al. 2015), landslide spatial prediction (Pham et al. 2018), etc. SVM  
351 performed not only in multiclass problems but also better in ordered multilevel problems and  
352 it worked better than traditional regression methods (Li et al. 2012). More details about the  
353 SVM algorithm is described by Noble (2006).

354 The last but not least to choose was the EGB. Extreme gradient boosting is also a machine  
355 learning algorithm known for its high-speed performance and efficient prediction accuracy



356 (Chang et al. 2018). The algorithm is based on Friedman's work (Friedman 2001) and  
357 implemented in R under the package xgboost (Chen et al. 2015). This method is known for its  
358 high performance on larger sample sizes (Georganos et al. 2018).

#### 359 **4. Analysis & discussion**

360 To identify the suitable model for the prediction of the size of debris, previously discussed  
361 methods were explored, and results were summarized and compared in this section.

##### 362 **4.1 Debris prediction using POLR**

363 The significance of the observed relationship between the size of the debris and the  
364 associated explanatory variables was measured using proportional odd logistic regression.  
365 Variable selection was made using backward selection (Andersen 2010). The above coefficients  
366 can be interpreted as follows: taking into consideration of p-values, and for each case supposing  
367 that all other coefficients were held constant, the decrease in three hours' rainfall is associated  
368 with a 94% lower odd the size of debris, an increase in six hours' rainfall was associated with  
369 4% increase in higher odd of the size of the debris (Table 2).

370 Table 2. POLR model coefficients.

| <b>Variables</b>    | <b>Coefficient</b> | <b>P value</b> | <b>Odds ratio</b> |
|---------------------|--------------------|----------------|-------------------|
| Three hours rain    | -0.051             | <0.01          | 0.949             |
| Six hours rain      | 0.039              | <0.01          | 1.040             |
| One day rain        | -0.009             | 0.01           | 0.990             |
| Slope length        | 0.039              | <0.01          | 1.040             |
| altitude            | 0.001              | 0.02           | 1.001             |
| Drainage: Good      | 1.246              | 0.13           | 3.477             |
| Drainage: Very good | 1.818              | 0.04           | 6.164             |
| <b>Intercepts:</b>  |                    |                |                   |
| <500 500-2000       | 2.313              | <0.01          | 10.105            |
| 500-2000 2000-5000  | 4.455              | <0.01          | 86.102            |
| 2000-5000 >5000     | 6.428              | <0.01          | 619.397           |

371

372



373 The goodness of fit and model diagnostic result shows that McFadden pseudo- $R^2$  was  
374 0.23 where the values between 0.2 and 0.4 indicated an excellent fit (Louviere et al. 2000). To  
375 test proportional odd assumptions, the Brant-Wald test (Brant, 1990) was used, and the result  
376 was summarized in Table 3. It shows that all probabilities for all variables including the  
377 omnibus are greater than the 0.05 threshold, except for slope length, which proves that the  
378 parallel regression assumption is satisfied.

379 Table 3. Parallel regression assumption test.

| Test for         | X <sup>2</sup> | df | Probability |
|------------------|----------------|----|-------------|
| Omnibus          | 12.6           | 14 | 0.56        |
| Three hours rain | 1.76           | 2  | 0.41        |
| Six hours rain   | 1.18           | 2  | 0.56        |
| One day rain     | 1.18           | 2  | 0.55        |
| Slope length     | 7.1            | 2  | 0.03        |
| altitude         | 1.31           | 2  | 0.52        |
| Drainage         | 0.19           | 4  | 1           |

380

381 The effect plot was used to demonstrate the change, in the likelihood of occurrence of  
382 landslides of a given volume, associated with the change in selected predictors. Figure 7 depicts  
383 the variation of probability of landslides of a given volume per three days' rainfall and slope  
384 length. The likelihood of occurrence of debris below 500m<sup>3</sup> was directly proportional to an  
385 increase in the rainfall for the slope length below 30m. There was a decrease in the occurrence  
386 of debris larger than 500m<sup>3</sup> as the rainfall increased. This decrease is an indication that shorter  
387 slope length was associated with a shallow debris (First column of Fig. 7). Moving from the  
388 first to the 4<sup>th</sup> column, the probability of shallow debris (below 500m<sup>3</sup>), the probability shifted  
389 from 0.9 to 0.6 as slope length increased from 30m to 170m, and the long tail of probability  
390 plots for debris of size above 500m<sup>3</sup> disappeared as the slope-length and rainfall increased. This  
391 shifted up the probability curve for critical debris from 0.2 to 0.9 for slope length below 30m  
392 to 0.9 for slope length above 110m, respectively.

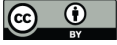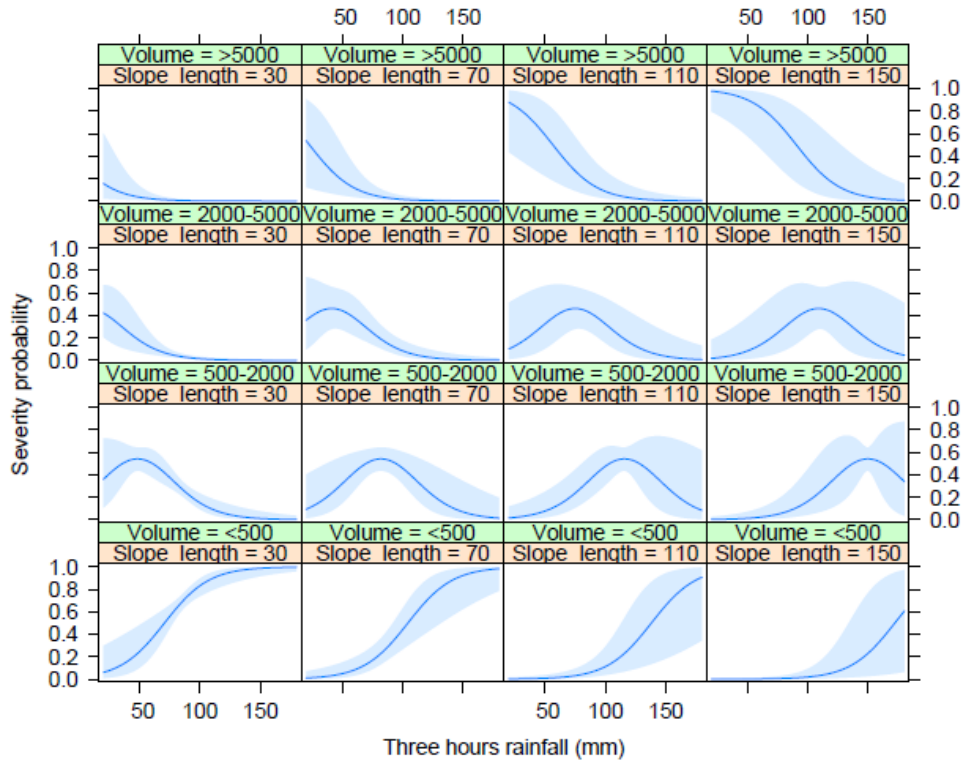

393  
 394 Figure 8. Effect of three hours of rainfall and slope length on size of debris.

395

396 Figure 9 illustrates that the maximum size of debris occurred at slope lengths above 50m  
 397 and with rainfall between 80mm to 110mm. Looking at the two upper light hand corners of Fig.  
 398 9, the probability of occurrence of debris above 5000m<sup>3</sup> peaked at slope length above 100m  
 399 and fade as the rain value increased, this fading associated with rain does not mean that there  
 400 is an inverse relationship with rainfall but it associated with the rarity of heavy rain in the  
 401 dataset. The probability of occurrence of shallow debris decreased as both altitude and slope  
 402 length increased. On the other hand, the chance of occurrence of debris of size between 500m<sup>3</sup>  
 403 and 2000m<sup>3</sup> increased with slope length and attained the maximum length between 70 and 80m  
 404 with the maximum probability of occurrence of 0.6, and the last one decreased for slope length





405 above 100m. For the medeium sized debris, the maximum probability of occurrence was 0.7  
406 and associated with slope lengths between 120m and 150m. The probability of occurrence of  
407 critical debris increased exponentially with slope length and altitude.

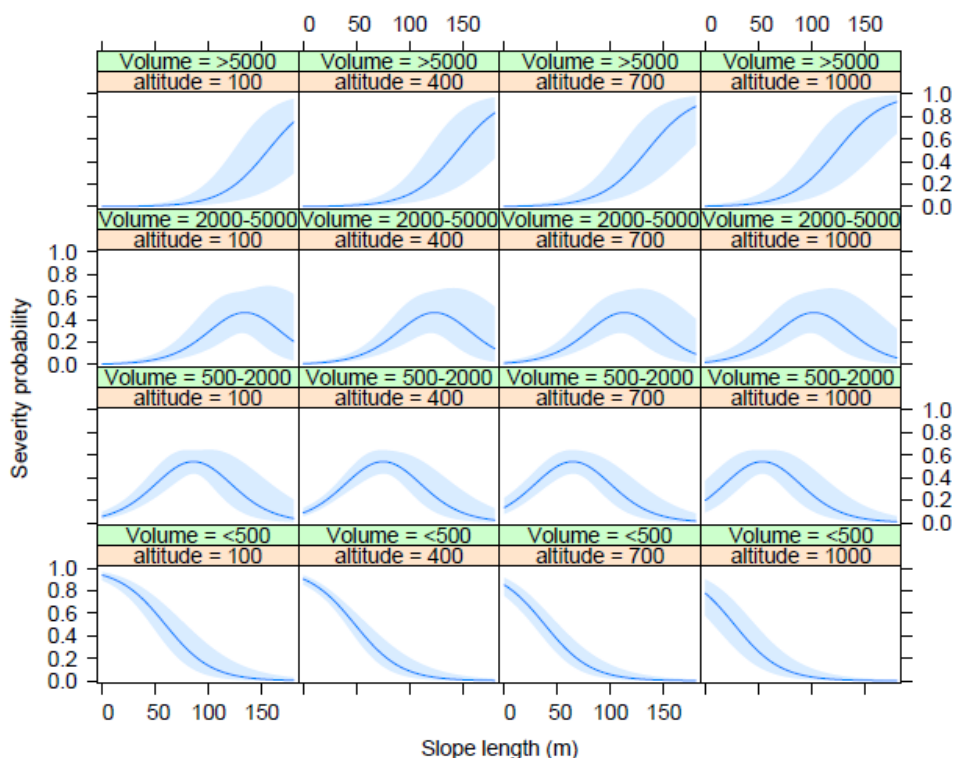

408  
409 Figure 9. Effect of altitude and slope length on size of debris.

410 The intuitive explanation of the continuous decrease with shallow debris is associated  
411 with the cumulative character of the model, which means that, what looks like a decrease is not  
412 a real decrease, it is a shift from a lower level to a higher level associated with an increase in  
413 variables into consideration. For altitude below 300m, shifting from a size below 500m<sup>3</sup> to 500-  
414 2000m<sup>3</sup> happened at 20m of slope length, while shifting from 500-2000m<sup>3</sup> to 2000-5000m<sup>3</sup> and  
415 above occurred at slope length between 60 to 80m.



416 **4.2 Debris prediction using RF**

417 The random forest model was run on the training set of 304 observations. The number of  
418 grown trees was 1000, the variable tried at each split was 4, and the out-of-bag error estimates  
419 (OOB) error rate was 24.42%. Figure 10a depicts the predictions of a class below 500m<sup>3</sup> that  
420 had the least errors. Since the model is for classification, to calculate the prediction error, the  
421 model was run on the test set. The variable importance graph illustrates the slope length was  
422 the most contributing variable to the model accuracy (Fig. 10b). The mean decrease Gini (cross-  
423 entropy loss after permutation) value is the measure of the contribution of each variable to the  
424 homogeneity of nodes and leaves in the random forest (Martinez-Taboada and Redondo 2020).  
425 The higher the value, the more important the variable is, which exhibited that slope length is  
426 more influencing factor for the size of debris.

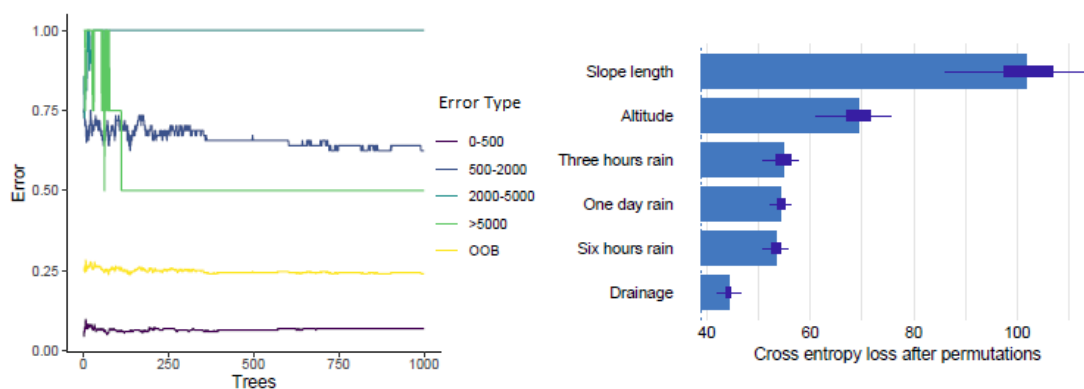

427

428 Figure 10. RF model: (a) training error rate, and (b) variable importance.

429 **4.3 Debris prediction using EGB**

430 To run the EGB, the train and test set were transformed into a sparse matrix, as it is run  
431 on numerical data matrices (Chen et al. 2022). The optimum model was obtained at the 881  
432 number of iterations and the learning rate of 0.3. Since the task was a multi-classification, the  
433 multi: softmax objective was used (Chen et al. 2022). The evaluation metric was mlogloss



434 (Multi-class log loss) (Kabani and El-Sakka 2016). While training the model, the minimum  
435 mlogloss were 0.025 and 0.088 for the training and test sets respectively (Fig. 11a). The  
436 difference between training and the test error is due to the larger variance associated with the  
437 fewer number of observations in the test set. The extreme gradient boosting associated with  
438 higher importance to slope length, altitude, slope and three hours of rainfall, respectively (Fig.  
439 11b).

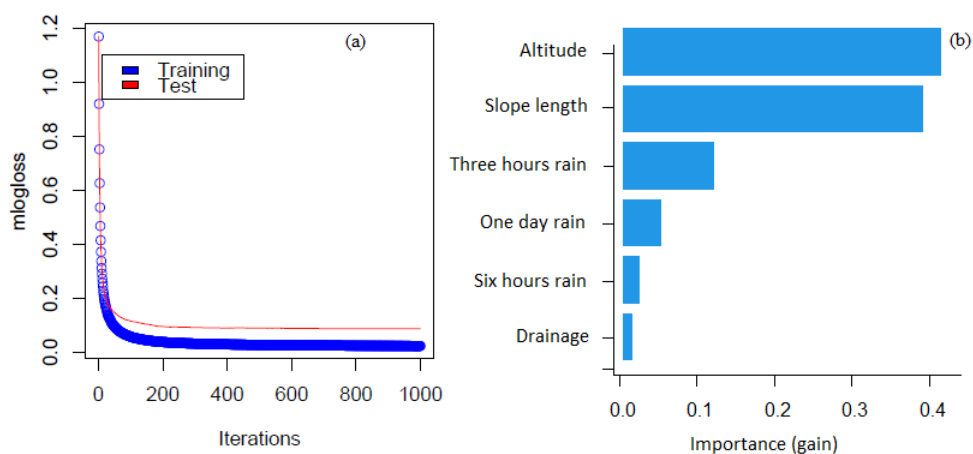

440

441 Figure 11. EGB model: (a) error rate and (b) variable importance.

#### 442 4.4 Debris prediction using SVM

443 The support vector classification model with linear kernel was applied, and the number  
444 of support vectors was 142. The outcome of SVM model shown a higher performance rate on  
445 the test than the training set. Figure 11a depicts a two-dimensional projection of train data using  
446 slope length and three hours of rainfall showing different shading and support vectors. One of  
447 the weaknesses of the SVM, it classified predictions into two lower classes as indicated in Fig.  
448 12a, it couldn't distinguish the moderates from extreme debris. The SVM assigned higher  
449 importance to slope length and three hours of rainfall as the second high ranking variable as



450 shown in Fig. 11b.

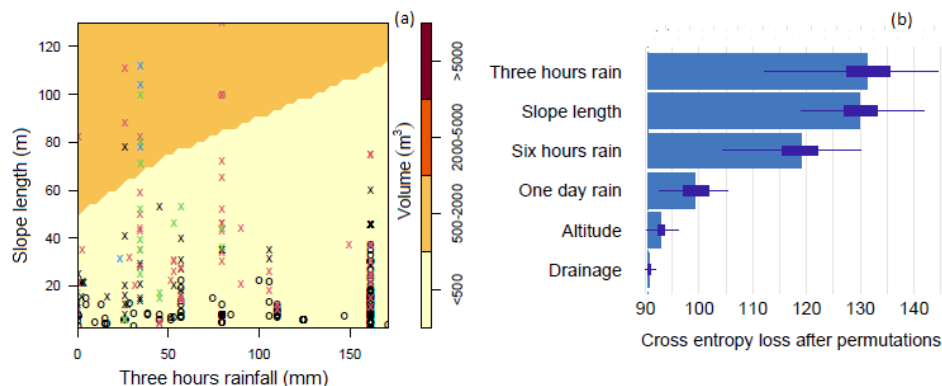

451

452 Figure 12. SVM model: (a) SVM classification plot, and (b) variable importance.

#### 453 **4.4 Discussion and model suitability assessment for landslide-induced debris severity** 454 **prediction**

455 This study analyzed the relationship between the severity of landslide-induced debris. The  
456 exploratory data analysis revealed that 93% of occurred debris was below 2000m<sup>3</sup>. The  
457 Gangwon province and Seoul were more vulnerable regions in terms of the frequency of  
458 incidents. Despite a higher frequency of debris in Seoul, their size was small compared to  
459 Gangwon province with higher number of cases and more large sized-debris. To analyse the  
460 significance of the relationship between the size of debris with different models ranked the  
461 slope length as the most influential variable for the size of the debris. To visualize the  
462 association of the slope length with the size of debris, the scatter plot (Fig.13) revealed that the  
463 pattern of increasing trend of slope length and size of debris was more remarkable across all  
464 provinces, shallow debris were associated with slope length below 50m. The debris cases were  
465 clustered between 20° and 40°, as depicted in Fig.13, and critical debris tended to be clustered  
466 around 30 degrees; the association of slope angle and size of debris was not statistically  
467 significant. For the soil-debris size relationship, sandy soil and clay were associated with a



468 higher frequency of debris; they exhibited shallow debris in all provinces except in Gangwon  
469 where severe debris occurred. It was observed that even though the silt loam soil was not highly  
470 frequent, it was vulnerable to severe debris as the slope length increased. Gangwon province  
471 was the region where the increasing relationship between the size of debris was observed, other  
472 provinces were not prone to severe debris.

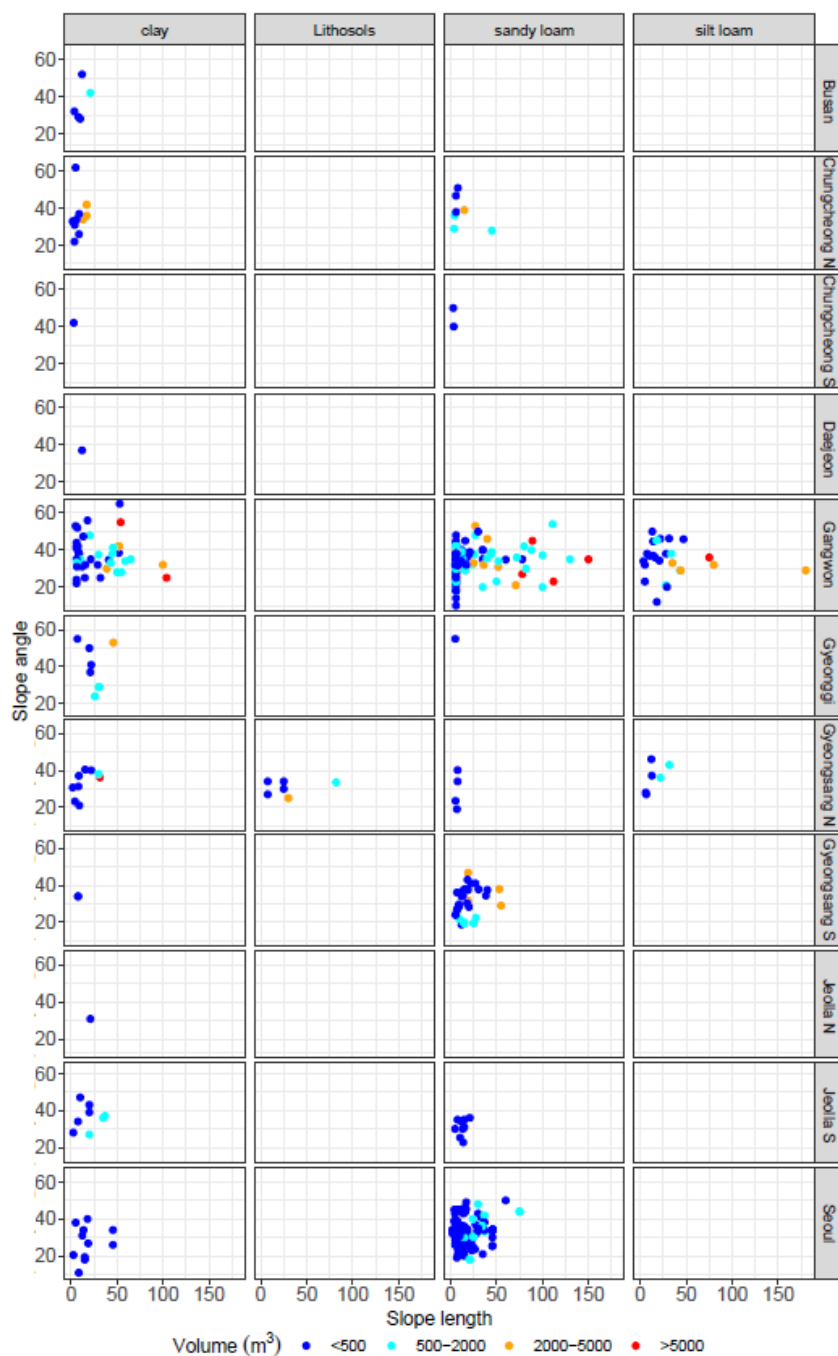

473

474 Figure 13. Province-wise scatter plot of debris' size per slope length, slope angle and soil



475 types.

476

477 To assess the suitability of utilized models, it was observed that the ordinal regression  
478 prediction power was low due to its inherent weakness; it does not perform well on the  
479 imbalanced dataset (Agresti 2010). That is, the outcome variable has some more prevalent  
480 levels than others. It also estimates the coefficient using maximum likelihood techniques,  
481 which require a large sample size, the used dataset was highly imbal-  
482 anced. Figure 7 revealed that almost 80% of all occurred debris was shallow, as result, the  
483 model coefficients became unstable with larger prediction intervals. Despite the weakness, the  
484 ordinal model has the effect display (Fox and Weisberg 2019), which clearly shows the effect  
485 of each variable to each extent and the associated probability. The predictive performance for  
486 each of the four discussed methods was summarized in Table 4 to facilitate their comparison.  
487 The random forest model performed well in all cases on the training set and validation as well.  
488 This model associated the influencing factor with higher importance and lower importance to  
489 rain-associated variables. RF prediction accuracy was very high on the training set (0.93), and  
490 0.90 on the test set. The prediction at 95% of confidence interval width ranged from 0.84 to  
491 0.94 on training and test sets, respectively. The NIR shifted from 72.28% to 74.17%, and this  
492 small increase is due to a small sample of the validation set.

493 The model accuracy for POLR was quite moderate based on the *kappa* value of 0.38. The  
494 performance accuracy was better, the no information rate,  $NIR=0.7228 < 0.7314$  lower  
495 boundaries of CI on the training set. This last condition was not satisfied for the test set, that is  
496  $NIR=0.74$  was higher than 0.69, which was the lower CI for the prediction interval on the test  
497 set. Based on the p-value for the prediction on test  $0.26 > 0.05$ , the performance was not reliable.  
498 This is confirmed by the overall performance metric *kappa* =0.30, which was quite moderate.

499



500

501 The EGB model ranked the second best model after the RF, it satisfied all prediction  
502 conditions the overall performance ( $kappa = 0.6121$ ) was slightly below the random forest  
503  $0.7273$ . The SVM model result was satisfactory for the training set. The lower bound of very  
504 close to the information rate and the overall performance was moderate ( $kappa=0.32$ ), the  
505 weakness of the model was its incapacity to distinguish the moderate debris from the extreme  
506 ones; as result, it predicted all debris into two lower categories in Fig. 8a. The NIR fell into the  
507 prediction interval on the validation set, and the p-value was  $0.11 > 0.05$ , which is an indication  
508 of moderate prediction accuracy.

509 Table 4. Model accuracy statistics for the four methods.

| <b>Model accuracy statistics</b> |             |                 |               |            |                |              |
|----------------------------------|-------------|-----------------|---------------|------------|----------------|--------------|
| <b>Method</b>                    | <b>Data</b> | <b>Accuracy</b> | <b>95% CI</b> | <b>NIR</b> | <b>P-Value</b> | <b>kappa</b> |
| RF                               | Train       | 0.93            | (0.89, 0.95)  | 0.72       | <0.001         | 0.82         |
|                                  | Test        | 0.90            | (0.84, 0.94)  | 0.74       | <0.001         | 0.72         |
| POLR                             | Train       | 0.78            | (0.73, 0.82)  | 0.72       | 0.011          | 0.38         |
|                                  | Test        | 0.76            | (0.69, 0.83)  | 0.74       | 0.26           | 0.3          |
| SVM                              | Train       | 0.77            | (0.72, 0.82)  | 0.72       | 0.015          | 0.32         |
|                                  | Test        | 0.78            | (0.71, 0.85)  | 0.74       | 0.11           | 0.3          |
| EGB                              | Train       | 0.86            | (0.81, 0.89)  | 0.72       | <0.001         | 0.63         |
|                                  | Test        | 0.86            | (0.79, 0.91)  | 0.74       | 0              | 0.6          |

510

511 The landslide-induced debris prediction is an extension of landslide susceptibility mapping and  
512 may be useful in the quantification and prediction of debris resulting from a rainfall-induced  
513 landslide. This quantification can facilitate risk management (Ho and Ko 2009), in the  
514 identification of regions prone to severe debris and the making of policies for mitigation  
515 (Carmela and Mario Parise 2022). For example the decision of planting more vegetation that  
516 fits the conditions of the region to strengthen the soil or deciding an appropriate activity to be  
517 done in a given region to improve stability ,safety and efficient land use (Mayer et al. 2008) .  
518 Furthermore, some activities in regions prone to severe debris may be prohibited for the safety





519 and well-being of the public(Frattini et al. 2010; DeGraff and Romesburg 2020; Di Napoli et  
520 al. 2020). In addition, the model may serve the disaster manager to create appropriate funds  
521 for post-disaster recovery. For example, if a region is expected to have shallow debris, the  
522 manager may establish a small fund for paying minor labour to repair the damaged environment.  
523 In extreme cases, a big fund may be created to pay for machinery and construction of preventive  
524 walls, plantation, and cost of machinery to remove debris in the affected region, to rehabilitate  
525 the impacted economic activities in the neighbourhood (Kachi et al. 2016). Due to the lack of  
526 financial data associated with the inventories the cost of post-disaster recovery was not  
527 estimated, more studies in the future may be carried out to fill this gap. The approach in this  
528 paper is valid for the studied area based on the user input data; more research in the future may  
529 be conducted to know whether the findings in this paper are general for regions with different  
530 characteristics or settings.

## 531 **6. Conclusions**

532 The study analyzed the relationship between the size of rainfall-induced debris and causal  
533 factors, i.e., time-based cumulative rainfall and influencing factors: soil types, vegetation, and  
534 geomorphology features. The exploratory data analysis revealed that the Gangwon province is  
535 prone to more frequent and more severe landslide-induced debris. Soil-related information  
536 revealed that the landslide-induced debris was more frequent in sandy soil and more severe,  
537 but its influence was not statistically significant in the predictive model. The region with non-  
538 perfected drainage systems also experienced severe debris. The regions with old timber that  
539 experienced fire had a higher debris likelihood. To examine the significance and to identify the  
540 suitable model for landslide-induced debris severity, four predictive modeling techniques i.e.,  
541 POLR, RF, EGB and SVM, were applied to examine the causal and influencing factors of the  
542 severity of rainfall-induced debris in South Korea. The performance metrics, accuracy and



543 *kappa* were applied to compare the predictive power of each of the four methods. The findings  
544 of this research revealed that three hours' rainfall, one-day rainfall, and slope length were the  
545 most influencing factor and altitude took the second place. This finding was consistent with the  
546 results of Lee et al. (2012), stating that short-duration rainfalls were responsible for landslides  
547 and are the cause of their severity. The comparative analysis has shown that random forest had  
548 better predictive power with an accuracy of 90% and *kappa* = 0.72, and extreme gradient  
549 boosting followed with an accuracy of 86% (*kappa* = 0.6). The last two methods SVM with an  
550 accuracy of 78% (4% above NIR), and POLR performance was moderate at 76%, which is  
551 only 2% above 74% performance decision basis (No information rate NIR), but we did not  
552 have enough information to confirm their use as a basis for creation early warning system for  
553 rainfall-induced extreme debris. This is because POLR does not perform well on limited and  
554 imbalanced data (Rahman et al. 2021), which is the root cause of a wide range of prediction  
555 intervals. Thus, RF and EGB may be used as a suitable models for rainfall-induced debris  
556 prediction. The creation of a nationwide landslide database would solve the shortage of reliable  
557 data and allow the usage of more alternative methods, which will result in more improved  
558 models. The findings of this research may be used for the elaboration of rainfall-induced debris  
559 mitigation policies such as post-disaster rehabilitation planning and land use management.

#### 560 **List of abbreviations**

- 561 • DALEX: moDel Agnostic Language for Exploration and explanation.
- 562 • MASS: Modern Applied Statistics with S.
- 563 • SVM: Support Vector Machine.
- 564 • POLR: Proportional Odd Logistic Regression.
- 565 • EGB: Extreme Gradient Boosting.
- 566 • RF: Random Forest.



- 567 • NIR: No information Rate.
- 568 • Acc: Accuracy.
- 569 • CI: confidence interval.
- 570 • OOB: Out Of Bag error estimates.
- 571 • CFM: Confusion Matrix.
- 572 • Caret: Classification and Regression Training

573 **Acknowledgments:**

574 This research was supported by Basic Science Research Program through the National  
575 Research Foundation of Korea (NRF) funded by the Ministry of Education  
576 (2021R1A6A1A03044326), and the grant (NRF-2021R1C1C2003316) funded by the National  
577 Research Foundation of Korea (NRF).

578 **Data availability:**

579 The datasets used and/or analyzed during the current study are available from the  
580 corresponding author on reasonable request.

581 **Declaration of Competing Interest:**

582 The authors declare that there are no conflicts of interest.

583

584

585

586

587

588



589 **References**

- 590 Agresti, A., 2010. Analysis of ordinal categorical data (Vol. 656). John Wiley & Sons.
- 591 Alexander, D., 1992. On the causes of landslides: Human activities, perception, and natural  
592 processes. *Environmental Geology and Water Sciences*, 20(3), 165-179.
- 593 Andersen, C. M., Bro, R., 2010. Variable selection in regression a tutorial. *Journal of*  
594 *chemometrics*, 24(11-12), 728-737.
- 595 Au, S. W. C., 1998. Rain-induced slope instability in Hong Kong. *Engineering Geology*, 51(1),  
596 1-36.
- 597 Baum, R. L., Godt, J. W., 2010. Early warning of rainfall-induced shallow landslides and debris  
598 flows in the USA. *Landslides*, 7(3), 259-272.
- 599 Berti, M., Martina, M. L. V., Franceschini, S., Pignone, S., Simoni, A., Pizziolo M., 2012.  
600 Probabilistic rainfall thresholds for landslide occurrence using a Bayesian approach.  
601 *Journal of Geophysical Research: Earth Surface*, 117(F4).
- 602 Biau, G., Scornet, E., 2016. A random forest-guided tour. *Test*, 25(2), 197-227.
- 603 Biecek P., 2018. DALEX: Explainers for Complex Predictive Models in R. *Journal of Machine*  
604 *Learning Research*, 19(84), 1-5. <https://jmlr.org/papers/v19/18-416.html>
- 605 Biecek, P., Burzykowski, T., 2021. Explanatory model analysis: Explore, explain and examine  
606 predictive models. Chapman and Hall/CRC.
- 607 Bilder, C. R., Loughin, T. M., 2014. Analysis of categorical data with R. CRC Press.
- 608 Brand, E. W., Premchitt, J. E. R. A. S. A. K., Phillipson, H. B., 1984, September. Relationship  
609 between rainfall and landslides in Hong Kong. In *Proceedings of the 4th International*  
610 *Symposium on Landslides* (Vol. 1, No. 01, pp. 276-84). Toronto: Canadian Geotechnical  
611 Society.
- 612 Brant, R., 1990. Assessing proportionality in the proportional odds model for ordinal logistic  
613 regression. *Biometrics*, 46, 1171–1178.



- 614 Breiman, L., 2001. Random forests. *Machine learning*, 45(1), 5-32.
- 615 Brunson, J. C., 2020. ggaluvial: Layered, Grammar for Alluvial Plots. *Journal of Open Source*  
616 *Software*, 5(49), doi:10.21105/joss.02017. <<https://doi.org/10.21105/joss.02017>>.
- 617 Caelen, O., 2017. A Bayesian interpretation of the confusion matrix. *Annals of Mathematics*  
618 *and Artificial Intelligence*, 81(3), 429-450.
- 619 Carmela and Mario Parise 2022. A Chronological Database about Natural and Anthropogenic  
620 Sinkholes in Italy. *Geosciences* 12:5, pages 200
- 621 Causes, L., 2001. *Landslide types and processes*. US Geological Survey: Reston, VA, USA.
- 622 Chang, C. W., Lin, P. S., Tsai, C. L., (2011). Estimation of sediment volume of debris flow  
623 caused by extreme rainfall in Taiwan. *Engineering Geology*, 123(1-2), 83-90.
- 624 Chang, W. J., Chou, S. H., Huang, H. P., Chao, C. Y., (2021). Development and verification of  
625 coupled hydro-mechanical analysis for rainfall-induced shallow landslides. *Engineering*  
626 *Geology*, 293, 106337.
- 627 Chang, Y. C., Chang, K. H., Wu, G. J., 2018. Application of eXtreme gradient boosting trees in  
628 the construction of credit risk assessment models for financial institutions. *Applied Soft*  
629 *Computing*, 73, 914-920.
- 630 Charles W. W., Shi, Q., 1998. A numerical investigation of the stability of unsaturated soil  
631 slopes subjected to transient seepage. *Computers and Geotechnics*, 22(1), 1-28.
- 632 Chen, T., He, T., Benesty, M., Khotilovich, V., Tang, Y., Cho, H., Chen, K., Mitchell, R., Cano,  
633 I., Zhou, T., Li, M., Xie, J., Lin, M., Geng, Y., Li, Y., Yuan, J., 2022. xgboost: Extreme  
634 Gradient Boosting. R package version 1.6.0.1 [https://CRAN.R](https://CRAN.Rproject.org/package=xgboost)  
635 [project.org/package=xgboost](https://CRAN.Rproject.org/package=xgboost)
- 636 Chen, T., He, T., Benesty, M., Khotilovich, V., Tang, Y., Cho, H., Chen, K., 2015. Xgboost: an  
637 extreme gradient boosting. R package version 0.4-2, 1(4), 1-4.
- 638 Chen, Y., Withanage, K. R., Uchimura, T., Mao, W., Nie, W., 2020. Shear deformation and



- 639 failure of unsaturated sandy soils in surface layers of slopes during rainwater infiltration.  
640 Measurement, 149, 107001.
- 641 Chinkulkijniwat, A., Salee, R., Horpibulsuk, S., Arulrajah, A., & Hoy, M. (2022). Landslide  
642 rainfall threshold for landslide warning in Northern Thailand. *Geomatics, Natural*  
643 *Hazards and Risk*, 13(1), 2425-2441.
- 644 Chough, S. K., Kwon, S. T., Ree, J. H., Choi, D. K., 2000. Tectonic and sedimentary evolution  
645 of the Korean peninsula: a review and new view. *Earth-Science Reviews*, 52(1-3), 175-  
646 235.
- 647 Coppola, L., Reder, A., Tarantino, A., Mannara, G., Pagano, L., 2022. Pre-failure suction-  
648 induced deformation to inform early warning of shallow landslides: Proof of concept at  
649 slope model scale. *Engineering Geology*, 106834.
- 650 Crawford, M. M., Bryson, L. S., Woolery, E. W., Wang, Z., 2019. Long-term landslide  
651 monitoring using soil-water relationships and electrical data to estimate suction stress.  
652 *Engineering Geology*, 251, 146-157.
- 653 Dahal, R. K., Hasegawa, S., Nonomura, A., Yamanaka, M., Masuda, T., Nishino, K., 2008.  
654 GIS-based weights-of-evidence modeling of rainfall-induced landslides in small  
655 catchments for landslide susceptibility mapping. *Environmental Geology*, 54(2), 311-  
656 324.
- 657 de Jesús Arce-Mojica, T., Nehren, U., Sudmeier-Rieux, K., Miranda, P. J., Anhuf, D., 2019.  
658 Nature-based solutions (NbS) for reducing the risk of shallow landslides: where do we  
659 stand? *International journal of disaster risk reduction*, 41, 101293.
- 660 DeGraff, J. V., and Romesburg, H. C. 2020. Regional landslide—susceptibility assessment for  
661 wildland management: a matrix approach. In *Thresholds in geomorphology* (pp. 401-  
662 414). Routledge.
- 663 Di Napoli, M., Carotenuto, F., Cevasco, A., Confuorto, P., Di Martire, D., Firpo, M., ...and



- 664 Calcaterra, D. 2020. Machine learning ensemble modelling as a tool to improve  
665 landslide susceptibility mapping reliability. *Landslides*, 17(8), 1897-1914.
- 666 Diaz-Uriarte, R., de Andrés, S. A., 2005. Variable selection from random forests: application  
667 to gene expression data. arXiv preprint q-bio/0503025.
- 668 Ding, C. H., Dubchak, I., 2001. Multi-class protein fold recognition using support vector  
669 machines and neural networks. *Bioinformatics*, 17(4), 349-358.
- 670 Fox, J., Weisberg, S., 2019. *An R companion to applied regression* 3rd ed Sage Thousand Oaks.
- 671 Franzluebbers, A. J., 2002. Water infiltration and soil structure related to organic matter and its  
672 stratification with depth. *Soil and Tillage research*, 66(2), 197-205.
- 673 Frattini, P., Crosta, G., and Carrara, A. 2010. Techniques for evaluating the performance of  
674 landslide susceptibility models. *Engineering geology*, 111(1-4), 62-72.
- 675 Friedman, J. H., 2001. Greedy function approximation: a gradient boosting machine. *Annals*  
676 *of Statistics*, 1189-1232.
- 677 Gariano, S. L., Guzzetti, F. 2016. Landslides in a changing climate. *Earth-Science Reviews*,  
678 162, 227-252.
- 679 Garson, G., 2021. *Data Analytics for the Social Sciences: Applications in R*.  
680 10.4324/9781003109396.
- 681 Georganos, S., Grippa, T., Vanhuyse, S., Lennert, M., Shimoni, M., Wolff, E., 2018. Very high-  
682 resolution object-based land use–land cover urban classification using extreme gradient  
683 boosting. *IEEE geoscience and remote sensing letters*, 15(4), 607-611.
- 684 Hakim, W. L., Rezaie, F., Nur, A. S., Panahi, M., Khosravi, K., Lee, C. W., Lee, S., 2022.  
685 Convolutional neural network (CNN) with metaheuristic optimization algorithms for  
686 landslide susceptibility mapping in Icheon, South Korea. *Journal of environmental*  
687 *management*, 305, 114367.
- 688 Harrell, F. E., 2015. Ordinal logistic regression. In *Regression modeling strategies* (pp. 311-



- 689           325). Springer, Cham.
- 690 He, Q., Wang, M. and Liu, K.,2021. Rapidly assessing earthquake-induced landslide  
691           susceptibility on a global scale using random forest. *Geomorphology*, 391, 107889.
- 692 Hidalgo, C. A., Vega, J. A., Parra Obando, M., 2017. Effect of the Rainfall Infiltration Processes  
693           on the Landslide Hazard Assessment of Unsaturated Soils in Tropical Mountainous  
694           Regions. In T. H. II, & P. Rao (Eds.), *Engineering and Mathematical Topics in Rainfall*.  
695           IntechOpen. [https://doi.org/ 10.5772/intechopen.70821](https://doi.org/10.5772/intechopen.70821).
- 696 Ho, K. K. S., and Ko, F. W. Y., 2009. Application of quantified risk analysis in landslide risk  
697           management practice: Hong Kong experience. *Georisk*, 3(3), 134-146.
- 698 Hong, H., Pradhan, B., Xu, C., Bui, D. T., 2015. Spatial prediction of landslide hazard at the  
699           Yihuang area (China) using two-class kernel logistic regression, alternating decision tree  
700           and support vector machines. *Catena*, 133, 266-281.
- 701 Huang, F., Chen, J., Du, Z., Yao, C., Huang, J., Jiang, Q., ..., Li, S., 2020. Landslide  
702           susceptibility prediction considering regional soil erosion based on machine-learning  
703           models. *ISPRS International Journal of Geo-Information*, 9(6), 377.
- 704 Huang, F., Chen, J., Liu, W., Huang, J., Hong, H., and Chen, W., 2022. Regional rainfall-  
705           induced landslide hazard warning based on landslide susceptibility mapping and a  
706           critical rainfall threshold. *Geomorphology*, 408, 108236.
- 707 Huang, G., Zheng, M., Peng, J., 2021. Effect of Vegetation Roots on the Threshold of Slope  
708           Instability Induced by Rainfall and Runoff. *Geofluids*.
- 709 Huang, Y., Zhao, L., 2018. Review on landslide susceptibility mapping using support vector  
710           machines. *Catena*, 165, 520-529.
- 711 Ju, N., Huang, J., He, C., Van Asch, T. W. J., Huang, R., Fan, X., ... , Wang, J. (2020). Landslide  
712           early warning, case studies from Southwest China. *Engineering Geology*, 279, 105917.
- 713 Kabani, A., El-Sakka, M. R., 2016, July. Object detection and localization using deep





- 714 convolutional networks with softmax activation and multi-class log loss. In International  
715 Conference on Image Analysis and Recognition (pp. 358-366). Springer, Cham.
- 716 Kadavi, P. R., Lee, C. W., Lee, S., 2019. Landslide-susceptibility mapping in Gangwon-do,  
717 South Korea, using logistic regression and decision tree models. Environmental Earth  
718 Sciences, 78(4), 1-17.
- 719 Kainthura P. and Sharma N., 2022. Machine learning driven landslide susceptibility prediction  
720 for the Uttarkashi region of Uttarakhand in India. Georisk: Assessment and Managem  
721 Kim, J. C., Lee, S., Jung, H. S., Lee, S., 2018. Landslide susceptibility mapping using random  
722 forest and boosted tree models in Pyeong-Chang, Korea. Geocarto international, 33(9),  
723 1000-1015.
- 724 Kim, J., Lee, K., Jeong, S., & Kim, G., 2014. GIS-based prediction method of landslide  
725 susceptibility using a rainfall infiltration-groundwater flow model. Engineering geology,  
726 182, 63-78.
- 727 Klose, M., Maurischat, P., Damm, B., 2016. Landslide impacts in Germany: A historical and  
728 socioeconomic perspective. Landslides, 13(1), 183-199.
- 729 Kockelman, W. J., 1986. Some techniques for reducing landslide hazards. Bulletin of the  
730 Association of Engineering Geologists, 23(1), 29-52.
- 731 Lacroix, P., Handwerger, A. L., Bièvre, G., 2020. Life and death of slow-moving landslides.  
732 Nature Reviews Earth & Environment, 1(8), 404-419.
- 733 Lechner, M., Okasa, G., 2020. orf: Ordered Random Forests. R package version 0.1, 3.
- 734 Lee, S. G., Winter, M. G., 2019. The effects of debris flow in the Republic of Korea and some  
735 issues for successful risk reduction. Engineering Geology, 251, 172-189.
- 736 Lee, S. W., Kim, G. H., Yune, C. Y., Ryu, H. J., Hong, S. J., 2012. Development of landslide-  
737 risk prediction model thorough database construction. Journal of the Korean  
738 geotechnical society, 28(4), 23-33.



- 739 Lee, S. W., Kim, G., Yune, C. Y., Ryu, H. J., 2013. Development of landslide-risk assessment  
740 model for mountainous regions in eastern Korea. *Disaster advances*, 6(6), 70-79.
- 741 Lee, S., Hong, S. M., Jung, H. S., 2017. A support vector machine for landslide susceptibility  
742 mapping in Gangwon Province, Korea. *Sustainability*, 9(1), 48.
- 743 Lee, S., Lee, M. J., Jung, H. S., Lee, S., 2020. Landslide susceptibility mapping using Naïve  
744 Bayes and Bayesian network models in Umyeonsan, Korea. *Geocarto international*,  
745 35(15), 1665-1679.
- 746 Li, Z., Liu, P., Wang, W., Xu, C., 2012. Using support vector machine models for crash injury  
747 severity analysis. *Accident Analysis & Prevention*, 45, 478-486.
- 748 Lin, L., Lin, Q., & Wang, Y. (2017). Landslide susceptibility mapping on a global scale using  
749 the method of logistic regression. *Natural Hazards and Earth System Sciences*, 17(8),  
750 1411-1424.
- 751 Liu, G., Dai E., Xu, X., Wu, W., Xiang A., 2018. Quantitative Assessment of Regional Debris-  
752 Flow Risk: A Case Study in Southwest China. *Sustainability*, 10, 2223.  
753 <https://doi.org/10.3390/su10072223>
- 754 Liu, Y., Xu, C., Huang, B., Ren, X., Liu, C., Hu, B., Chen, Z., 2020. Landslide displacement  
755 prediction based on multi-source data fusion and sensitivity states. *Engineering Geology*,  
756 271, 105608.
- 757 Liu, Z., Gilbert, G., Cepeda, J. M., Lysdahl, A. O. K., Piciullo, L., Hefre, H., Lacasse, S., 2021.  
758 Modeling of shallow landslides with machine learning algorithms. *Geoscience Frontiers*,  
759 12(1), 385-393.
- 760 Lombardo, L., & Mai, P. M. (2018). Presenting logistic regression-based landslide  
761 susceptibility results. *Engineering geology*, 244, 14-24.
- 762 Louviere, J. J., Hensher, D. A., Swait, J. D., 2000. Stated choice methods: analysis and  
763 applications. Cambridge university press.



- 764 Marjanović, M., Kovačević, M., Bajat, B., Voženílek, V., 2011. Landslide susceptibility  
765 assessment using SVM machine learning algorithm. *Engineering Geology*, 123(3), 225-  
766 234.
- 767 Martinez-Taboada, F., Redondo, J. I., 2020. Variable importance plot (mean decrease accuracy  
768 and mean decrease Gini). *Plos One*, 15(4), e0230799.
- 769 Max K., 2022. caret: Classification and Regression Training. R package version 6.0-92.  
770 <https://CRAN.R-project.org/package=caret>.
- 771 Mayer, R., Plank, C., Bohner, A., Kollarits, S., Corsini, A., Ronchetti, F., ... and Jindra, P., 2008.  
772 Monitor: Hazard monitoring for risk assessment and risk communication. *Georisk*, 2(4),  
773 195-222.
- 774 McColl, S. T., 2022. Landslide causes and triggers. In *Landslide Hazards, Risks, and Disasters*  
775 (pp. 13-41). Elsevier.
- 776 McCullagh, P., 1980. Regression models for ordinal data. *Journal of the Royal Statistical*  
777 *Society: Series B (Methodological)*, 42(2), 109-127
- 778 McNulty, K., 2021. *Handbook of Regression Modeling in People Analytics: With Examples in*  
779 *R and Python*. Chapman and Hall/CRC.
- 780 Meena, S. R., Ghorbanzadeh, O., van Westen, C. J., Nachappa, T. G., Blaschke, T., Singh, R.  
781 P., Sarkar, R., 2021. Rapid mapping of landslides in the Western Ghats (India) triggered  
782 by 2018 extreme monsoon rainfall using a deep learning approach. *Landslides*, 18(5),  
783 1937-1950.
- 784 Meena, S. R., Puliero, S., Bhuyan, K., Floris, M., Catani, F., 2022. Assessing the importance  
785 of conditioning factor selection in landslide susceptibility for the province of Belluno  
786 (region of Veneto, northeastern Italy). *Natural hazards and earth system sciences*, 22(4),  
787 1395-1417.
- 788 Meyer, D., Dimitriadou, E., Hornik, K., Weingessel, A., Leisch, F., 2021. e1071: Misc



- 789 Functions of the Department of Statistics, Probability Theory Group (Formerly: E1071),  
790 TU Wien. R package version 1.7-9, <https://CRAN.R-project.org/package=e1071>
- 791 Nandi A. and Shakoor, A., 2008. Application of logistic regression model for slope instability  
792 prediction in Cuyahoga River Watershed, Ohio, USA. *Georisk*, 2(1), 16-27.
- 793 Negi, H. S., Kumar, A., Rao, N. N., Thakur, N. K., Shekhar, M. S., 2020. Susceptibility  
794 assessment of rainfall-induced debris flow zones in Ladakh–Nubra region, Indian  
795 Himalaya. *Journal of Earth System Science*, 129(1), 1-20.
- 796 NGII, 2018. Digital elevation model, NGII (National Geographical Information Institute), the  
797 Ministry of Land, Infrastructure and Transport, Korea.
- 798 Ngo, P. T. T., Panahi, M., Khosravi, K., Ghorbanzadeh, O., Kariminejad, N., Cerda, A., Lee,  
799 S., 2021. Evaluation of deep learning algorithms for national scale landslide  
800 susceptibility mapping of Iran. *Geoscience Frontiers*, 12(2), 505-519.
- 801 Noble, W. S., 2006. What is a support vector machine? *Nature Biotechnology*, 24(12), 1565-  
802 1567.
- 803 Ozioko, O. H., Igwe, O., 2020. GIS-based landslide susceptibility mapping using heuristic and  
804 bivariate statistical methods for Iva Valley and environs of Southeast Nigeria.  
805 *Environmental monitoring and assessment*, 192(2), 1-19.
- 806 Panahi, M., Gayen, A., Pourghasemi, H. R., Rezaie, F., Lee, S., 2020. Spatial prediction of  
807 landslide susceptibility using hybrid support vector regression (SVR) and the adaptive  
808 neuro-fuzzy inference system (ANFIS) with various metaheuristic algorithms. *Science  
809 of the Total Environment*, 741, 139937.
- 810 Park, S., Choi, C., Kim, B., Kim, J., 2013. Landslide susceptibility mapping using frequency  
811 ratio, analytic hierarchy process, logistic regression, and artificial neural network  
812 methods at the Inje area, Korea. *Environmental earth sciences*, 68(5), 1443-1464.
- 813 Park, S., Kim, J., 2019. Landslide susceptibility mapping based on random forest and boosted



- 814 regression tree models, and a comparison of their performance. *Applied Sciences*, 9(5),  
815 942.
- 816 Peruccacci, S., Brunetti, M. T., Gariano, S. L., Melillo, M., Rossi, M., & Guzzetti, F., 2017.  
817 Rainfall thresholds for possible landslide occurrence in Italy. *Geomorphology*, 290, 39-  
818 57.
- 819 Pham, B. T., Tien Bui, D., Prakash, I., 2018. Bagging-based support vector machines for spatial  
820 prediction of landslides. *Environmental Earth Sciences*, 77(4), 1-17.
- 821 Polemio, M., and Petrucci, O. 2000. Rainfall as a landslide triggering factor an overview of  
822 recent international research. *Landslides in research, theory and practice*.
- 823 Popescu, M. E. 2002. Landslide causal factors and landslide remedial options. In 3rd  
824 international conference on landslides, slope stability and safety of infra-structures (pp.  
825 61-81). CI-Premier PTE LTD Singapore.
- 826 Rahman, H. A. A., Wah, Y. B., Huat, O. S., 2021. Predictive Performance of Logistic  
827 Regression for Imbalanced Data with Categorical Covariate. *Pertanika Journal of*  
828 *Science & Technology*, 29(1).
- 829 Rahardjo, H., Nistor, M. M., Gofar, N., Satyanaga, A., Xiaosheng, Q., and Chui Yee, S. I., 2020.  
830 Spatial distribution, variation and trend of five-day antecedent rainfall in Singapore.  
831 *Georisk: Assessment and Management of Risk for Engineered Systems and Geohazards*,  
832 14(3), 177-191.
- 833 Raja, N. B., Çiçek, I., Türkoğlu, N., Aydin, O., Kawasaki, A., 2017. Landslide susceptibility  
834 mapping of the Sera River Basin using the logistic regression model. *Natural Hazards*,  
835 85(3), 1323-1346.
- 836 Rengers, F. K., McGuire, L. A., Oakley, N. S., Kean, J. W., Staley, D. M., and Tang, H., 2020.  
837 Landslides after wildfire: Initiation, magnitude, and mobility. *Landslides*, 17(11), 2631-  
838 2641.



- 839 Rivas, V., Remondo, J., Bonachea, J., & Sánchez-Espeso, J. (2022). Rainfall and weather  
840 conditions inducing intense landslide activity in northern Spain (Deba, Guipúzcoa).  
841 *Physical Geography*, 43(4), 419-439.
- 842 Sameen, M. I., Pradhan, B., Lee, S., 2020. Application of convolutional neural networks  
843 featuring Bayesian optimization for landslide susceptibility assessment. *Catena*, 186,  
844 104249.
- 845 Sarkar, R., Dikshit, A., Hazarika, H., Yamada, K., Subba, K., 2019. Probabilistic rainfall  
846 thresholds for landslide occurrences in Bhutan. *International Journal of Recent  
847 Technology and Engineering*.
- 848 Sarkar, R., Dorji, K., 2019. Determination of the probabilities of landslide events—a case study  
849 of Bhutan. *Hydrology*, 6(2), 52.
- 850 Segoni, S., Piciullo, L., Gariano, S. L., 2018. A review of the recent literature on rainfall  
851 thresholds for landslide occurrence. *Landslides*, 15(8), 1483-1501
- 852 Shahabi, H., Hashim, M., 2015. Landslide susceptibility mapping using GIS-based statistical  
853 models and Remote sensing data in the tropical environment. *Scientific reports*, 5(1), 1-  
854 15.
- 855 Šilhán, K.; and Stoffel, M., 2015. Impacts of age-dependent tree sensitivity and dating  
856 approaches on dendrogeomorphic time series of landslides. *Geomorphology*, 236, 34-  
857 43.
- 858 Su, C., Wang, B., Lv, Y., Zhang, M., Peng, D., Bate, B., and Zhang, S. 2022. Improved landslide  
859 susceptibility mapping using unsupervised and supervised collaborative machine  
860 learning models. *Georisk: Assessment and Management of Risk for Engineered Systems  
861 and Geohazards*, 1-19.
- 862 Sun, D., Xu, J., Wen, H., and Wang, D., 2021. Assessment of landslide susceptibility mapping  
863 based on Bayesian hyperparameter optimization: A comparison between logistic



- 864 regression and random forest. *Engineering Geology*, 281, 105972.
- 865 Sun, D., Wen, H., Wang, D., and Xu, J. 2020. A random forest model of landslide susceptibility  
866 mapping based on hyperparameter optimization using Bayes algorithm. *Geomorphology*,  
867 362, 107201.
- 868 Susmaga, R., 2004. Confusion matrix visualization. In *Intelligent information processing and*  
869 *web mining* (pp. 107-116). Springer, Berlin, Heidelberg.
- 870 Takara, K., Yamashiki, Y., Sassa, K., Ibrahim, A. B., & Fukuoka, H., 2010. A distributed  
871 hydrological–geotechnical model using satellite-derived rainfall estimates for shallow  
872 landslide prediction system at a catchment scale. *Landslides*, 7(3), 237-258.
- 873 Tang, D., Li, D. Q., and Cao, Z. J., 2017. Slope stability analysis in the Three Gorges Reservoir  
874 Area considering effect of antecedent rainfall. *Georisk: Assessment and Management of*  
875 *Risk for Engineered Systems and Geohazards*, 11(2), 161-172.
- 876 Taylor, F. E., Tarolli, P., Malamud, B. D., 2020. Preface: Landslide–transport network  
877 interactions. *Natural Hazards and Earth System Sciences*, 20(10), 2585-2590.
- 878 Team, R. C., 2021. R: A language and environment for statistical computing. R Foundation for  
879 Statistical Computing, Vienna, Austria. URL <https://www.R-project.org/>
- 880 Tiwari, B., Ajmera, B., Gonzalez, A., and Sonbol, H. 2020. Impact of wildfire on triggering  
881 mudslides—a case study of 2018 Montecito debris flows. In *Geo-Congress 2020:*  
882 *Engineering, Monitoring, and Management of Geotechnical Infrastructure* (pp. 40-49).  
883 Reston, VA: American Society of Civil Engineers.
- 884 Turner, A. K., 2018. Social and environmental impacts of landslides. *Innovative Infrastructure*  
885 *Solutions*, 3(1), 1-25.
- 886 Vahedifard, F., Sehat, S., and Aanstoos, J. V. 2017. Effects of rainfall, geomorphological and  
887 geometrical variables on vulnerability of the lower Mississippi River levee system to  
888 slump slides. *Georisk: Assessment and Management of Risk for Engineered Systems*



- 889           and Geohazards, 11(3), 257-271.
- 890   Van der Beek, P., 2021. Stressed rocks cause big landslides. *Nature Geoscience*, 14(5), 261-  
891           262.
- 892   Van Tien, P., Luong, L. H., Duc, D. M., Trinh, P. T., Quynh, D. T., Lan, N. C.,..., Loi, D. H.,  
893           2021. Rainfall-induced catastrophic landslide in Quang Tri Province: the deadliest single  
894           landslide event in Vietnam in 2020.
- 895   Wang, X., Xiao, Y., Shi, W., Ren, J., Liang, F., Lu, J., ..., Yu, X., 2022b. Forensic analysis and  
896           numerical simulation of a catastrophic landslide of dissolved and fractured rock slope  
897           subject to underground mining. *Landslides*, 19(5), 1045-1067.
- 898   Wang, Y., Tang, H., Huang, J., Wen, T., Ma, J., Zhang, J., 2022a. A comparative study of  
899           different machine learning methods for reservoir landslide displacement prediction.  
900           *Engineering Geology*, 298, 106544.
- 901   Wickham, H., François, R., Henry, L., Müller, K., 2022. *dplyr: A Grammar of Data*  
902           *Manipulation. R package version 1.0.9*, <https://CRAN.R-project.org/package=dplyr>
- 903   Wickham, H., 2016. *ggplot2: Elegant Graphics for Data Analysis*. Springer-Verlag New York.
- 904   Winter, M. G., 2020. Debris flows. Geological Society, London, *Engineering Geology Special*  
905           *Publications*, 29(1), 163-185.
- 906   Woo, C., Kwon, H., Lee, C., Kim, K., 2014. Landslide hazard prediction map based on logistic  
907           regression model for applying in the whole country of South Korea. *Journal of the*  
908           *Korean Society of Hazard Mitigation*, 14(6), 117-123.
- 909   Yesilnacar, E., and Topal, T. A. M. E. R., 2005. Landslide susceptibility mapping: a comparison  
910           of logistic regression and neural networks methods in a medium scale study, Hendek  
911           region (Turkey). *Engineering Geology*, 79(3-4), 251-266.
- 912   Yilmaz, I., 2009. Landslide susceptibility mapping using frequency ratio, logistic regression,  
913           artificial neural networks and their comparison: a case study from Kat landslides





- 914 (Tokat—Turkey). *Computers & Geosciences*, 35(6), 1125-1138.
- 915 Zeng, H., Tang, C. S., Zhu, C., Vahedifard, F., Cheng, Q., Shi, B., 2022. Desiccation cracking  
916 of soil subjected to different environmental relative humidity conditions. *Engineering*  
917 *Geology*, 297, 106536.
- 918 Zhao, Y., Wang, R., Jiang, Y., Liu, H., Wei, Z., 2019. GIS-based logistic regression for rainfall-  
919 induced landslide susceptibility mapping under different grid sizes in Yueqing,  
920 Southeastern China. *Engineering Geology*, 259, 105147.
- 921 Zhu, H., and Zhang, L. 2019. Root-soil-water hydrological interaction and its impact on slope  
922 stability. *Georisk: Assessment and Management of Risk for Engineered Systems and*  
923 *Geohazards*, 13(4), 349-359.
- 924
